# Supplementary material for: Methods detecting rhythmic gene expression are biologically relevant only for strong signal
Source: PubMed Central journal article supplement (PMC7100990; doi:10.1371/journal.pcbi.1007666), 2020-03-17
Supplement: pcbi.1007666.s003.pdf [file pcbi.1007666.s003.pdf]

# VERTEBRATES

default  $p$ -values

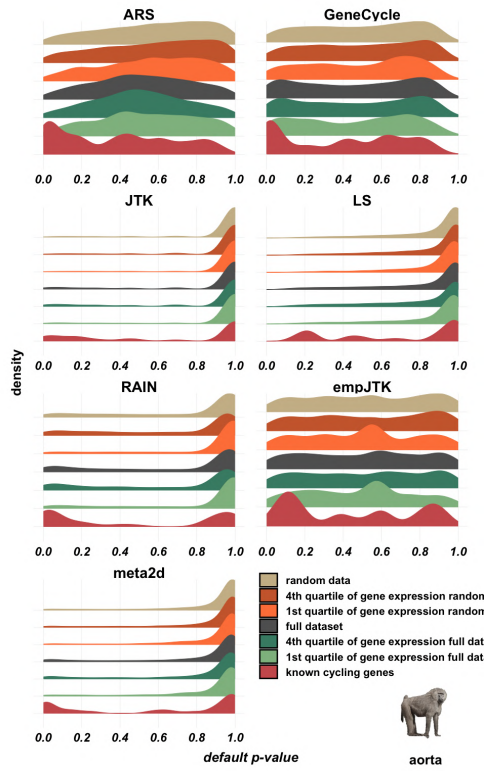

Fig. S1

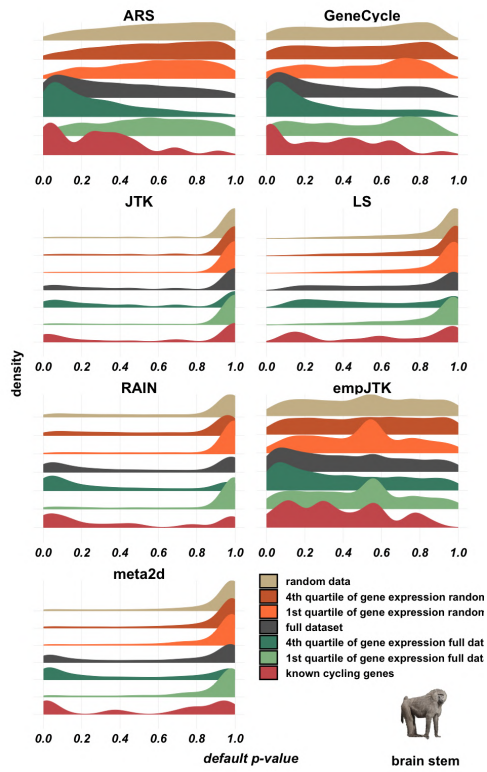

Fig. S2





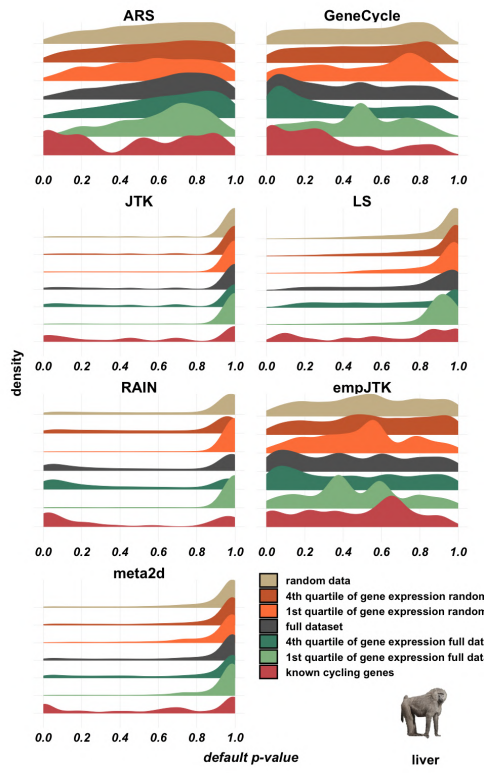

Fig. S7

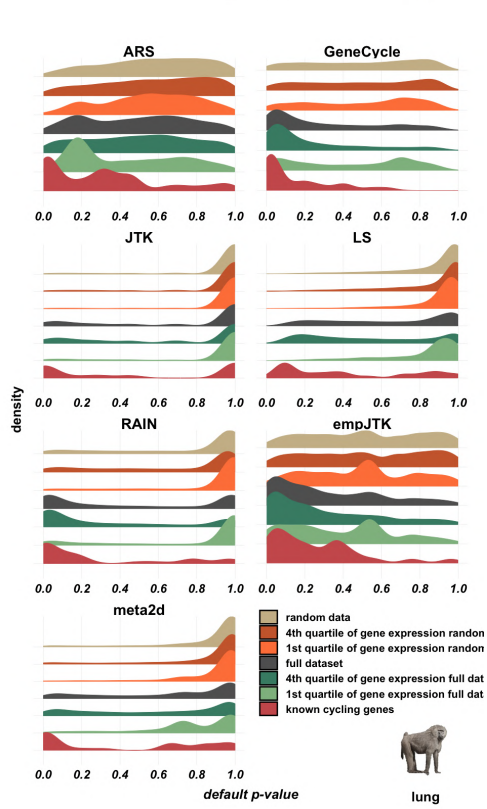

Fig. S8

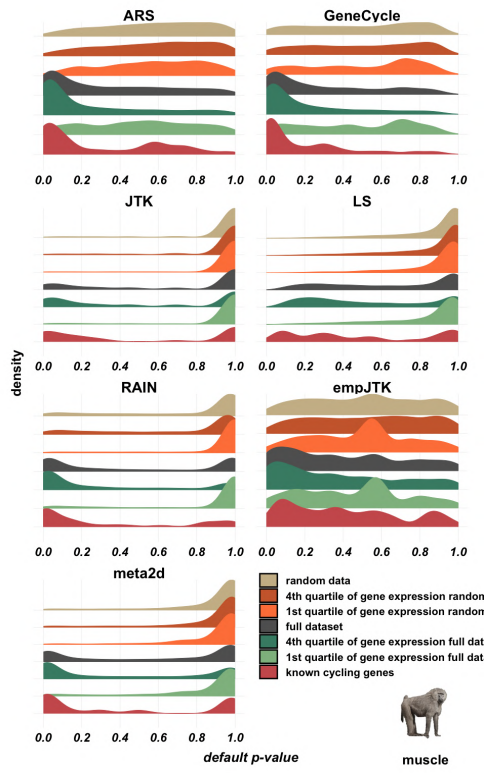

Fig. S9

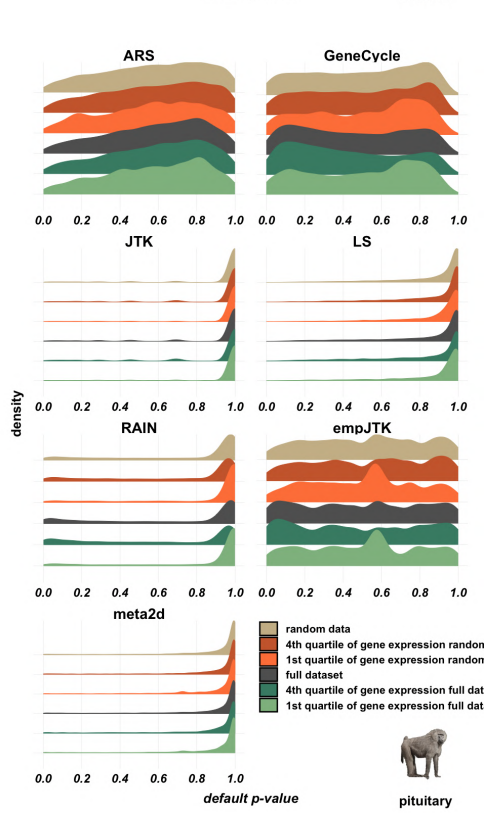

Fig. S10



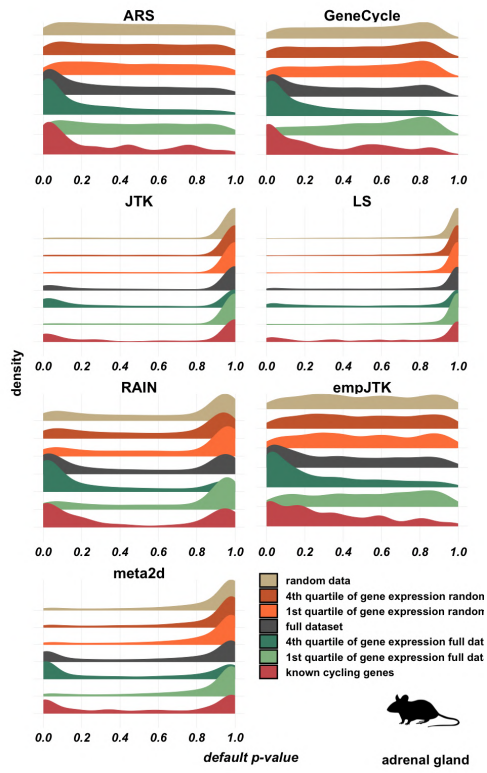

Fig. S13

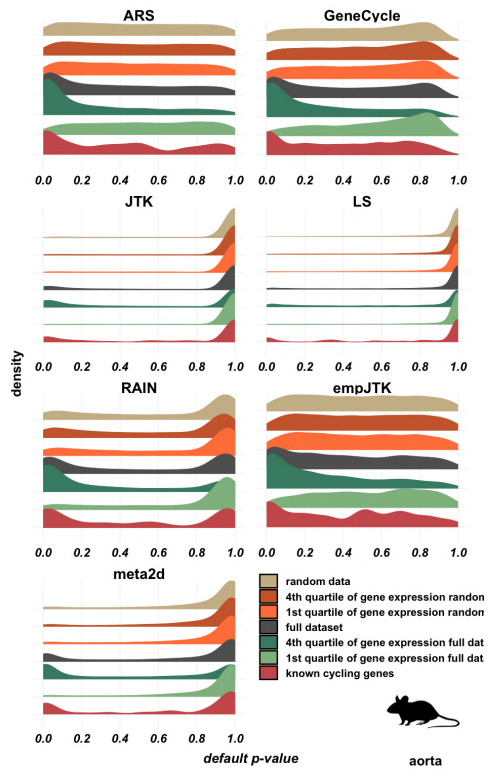

Fig. S14

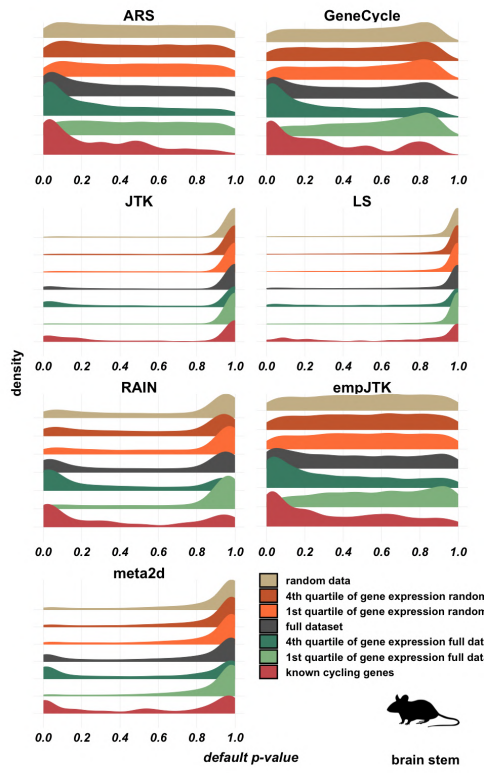

Fig. S15

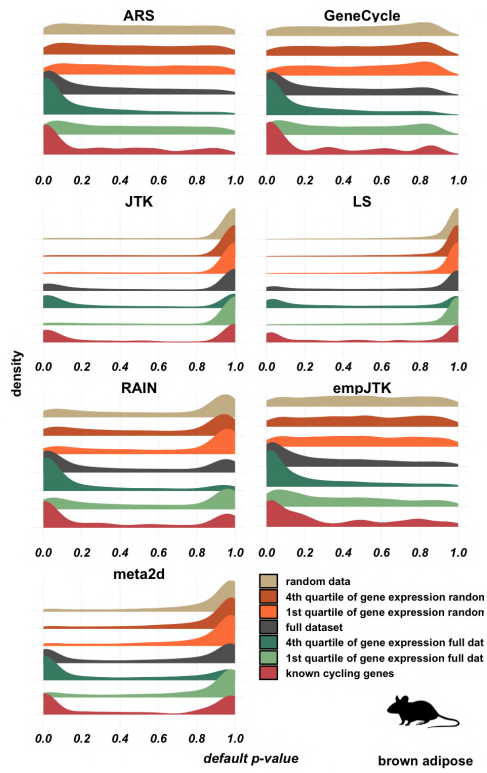

Fig. S16



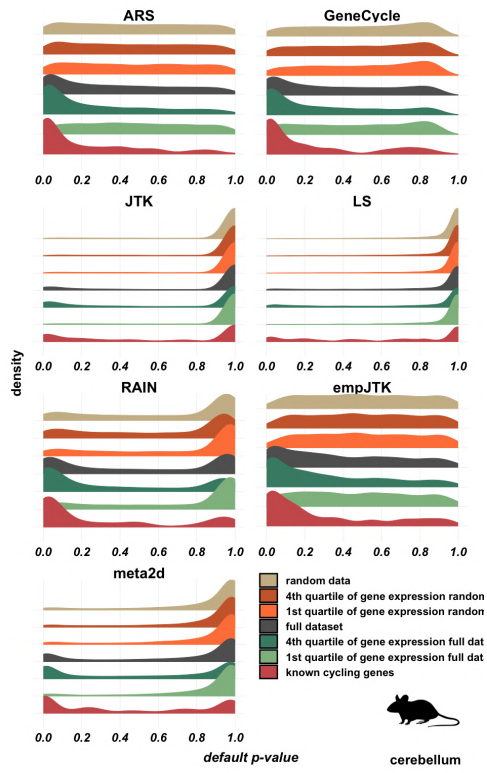

Fig. S17

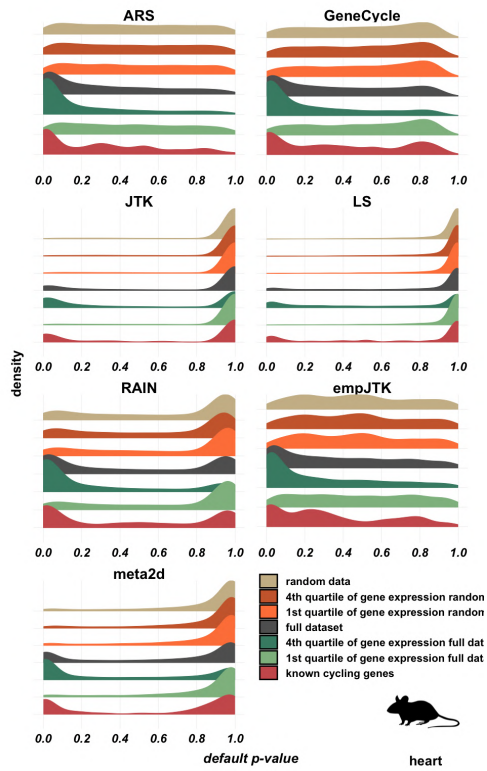

Fig. S18



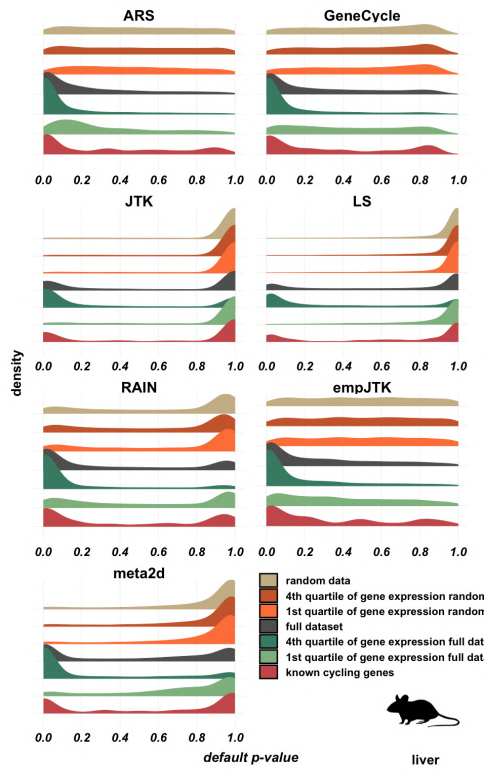

Fig. S21

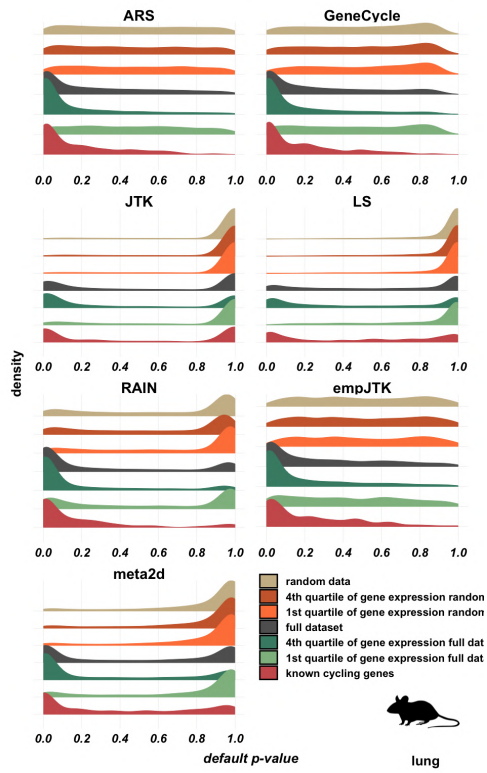

Fig. S22

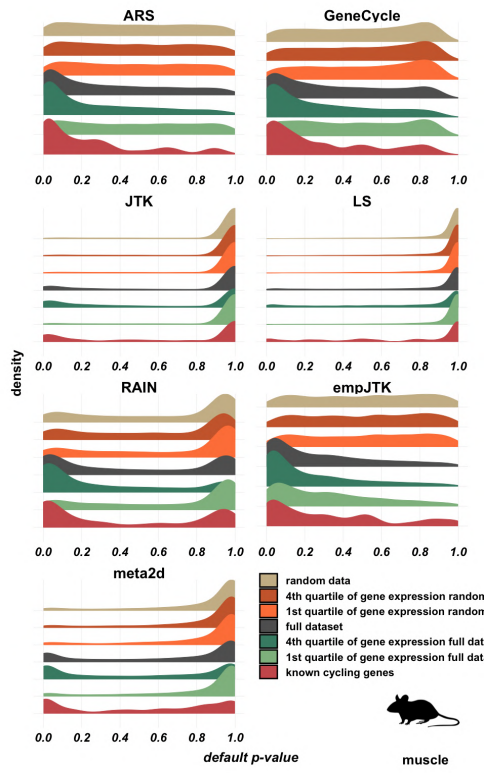

Fig. S23

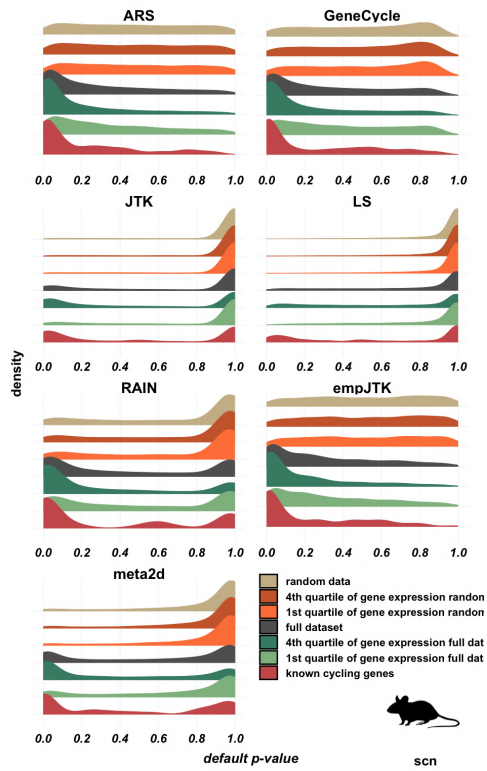

Fig. S24

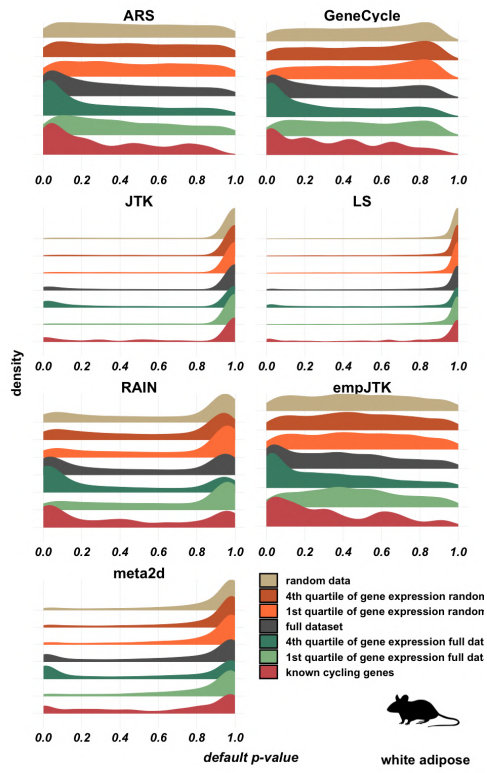

Fig. S25

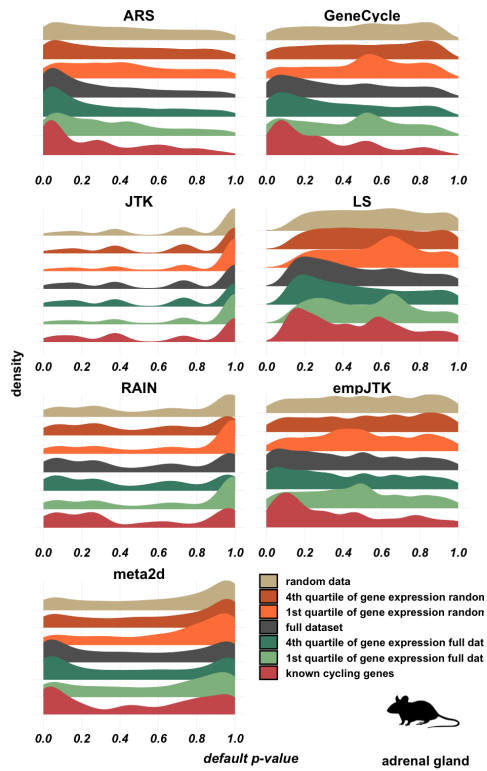

Fig. S26

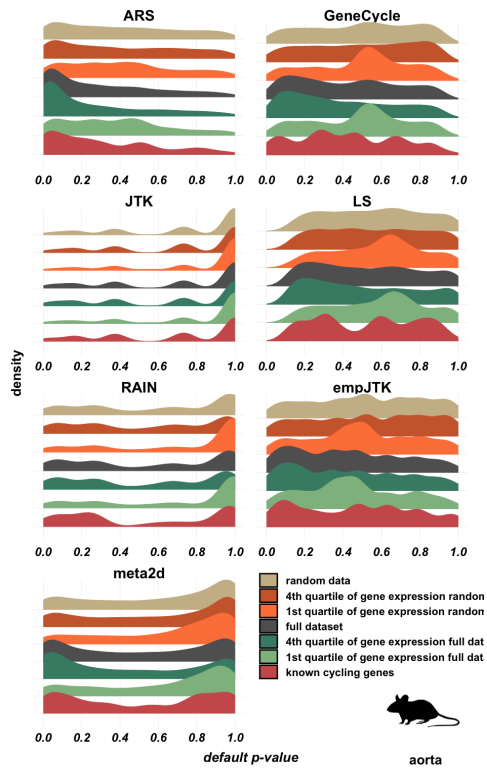

Fig. S27

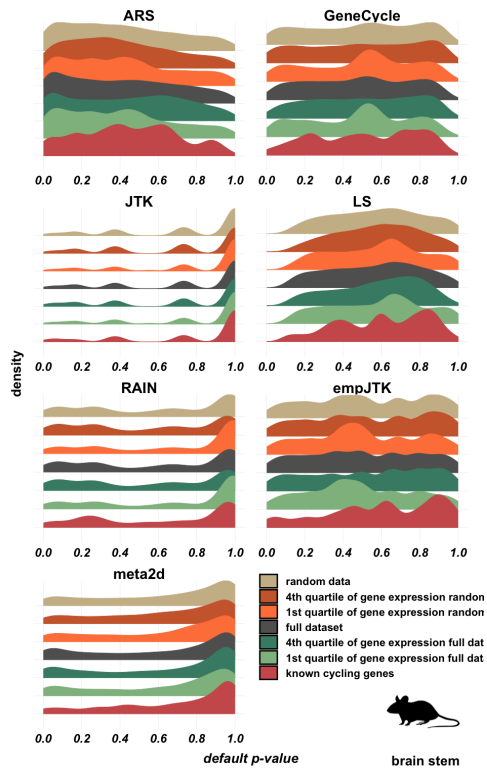

Fig. S28

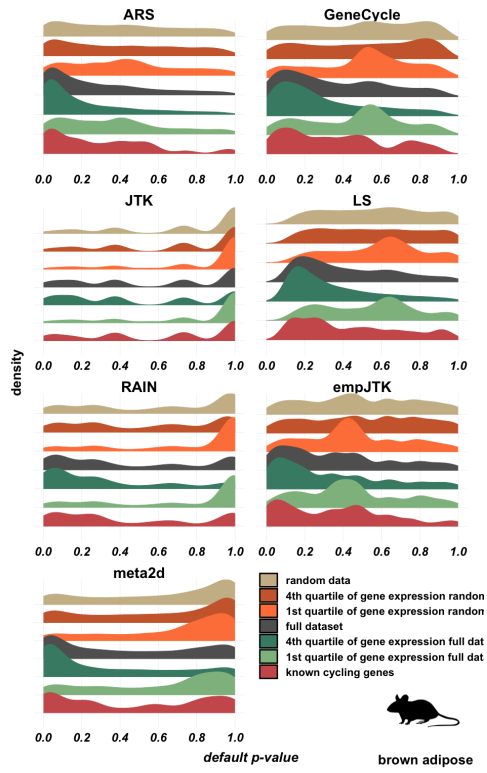

Fig. S29

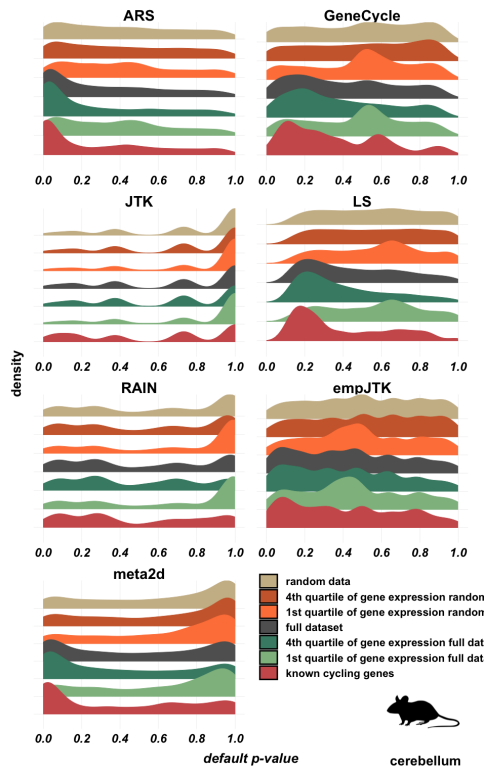

Fig. S30

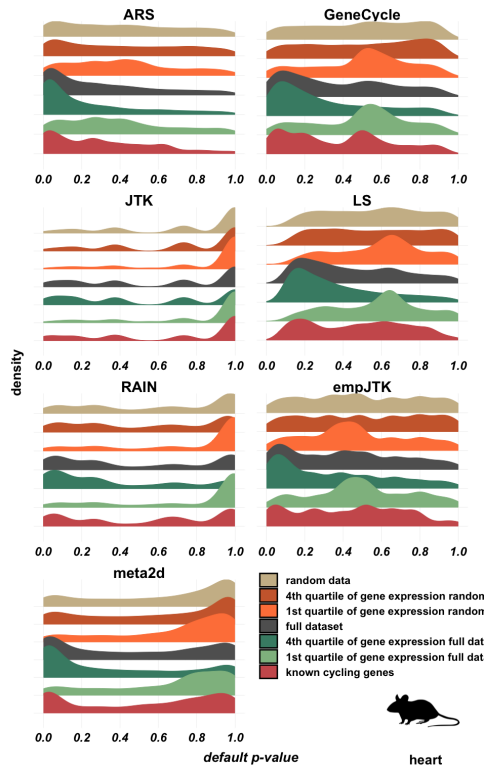

Fig. S31

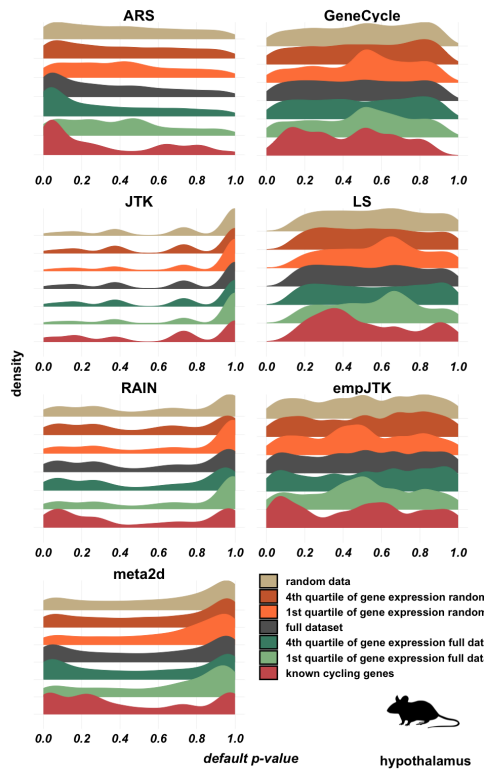

Fig. S32





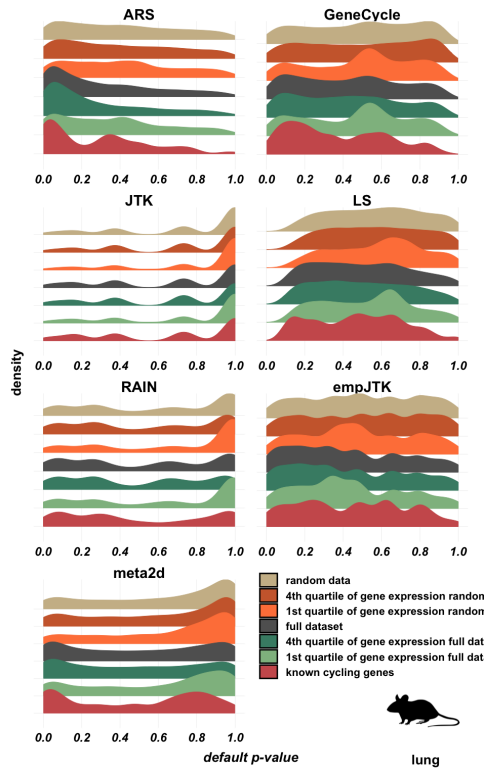

Fig. S35

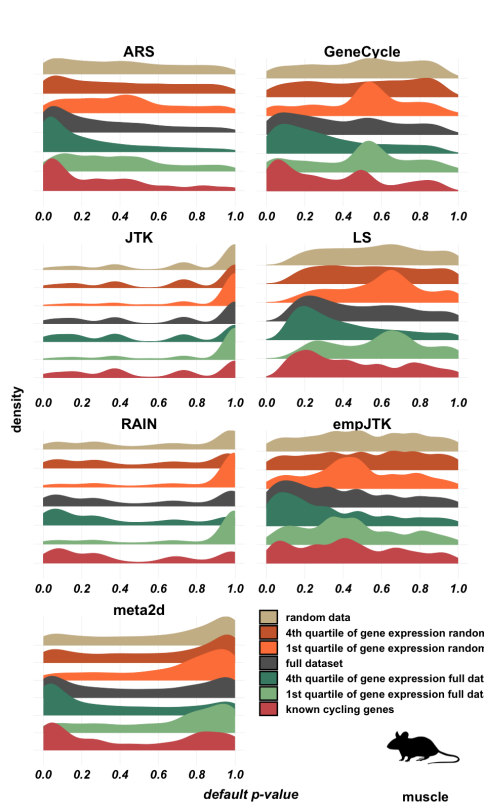

Fig. S36

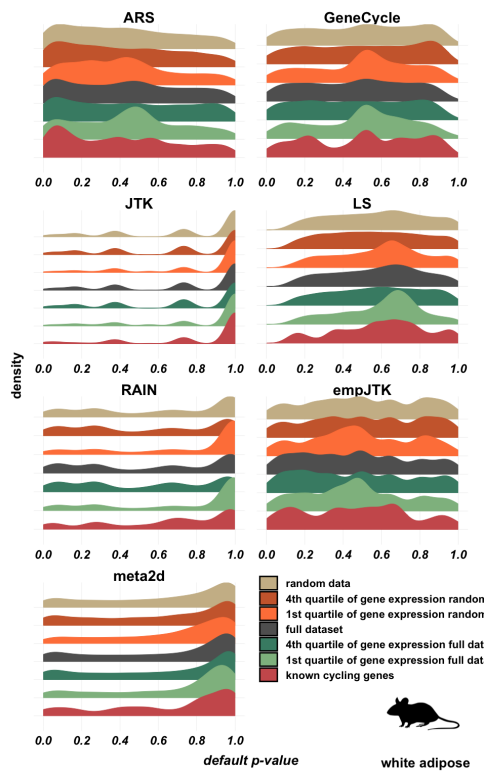

Fig. S37

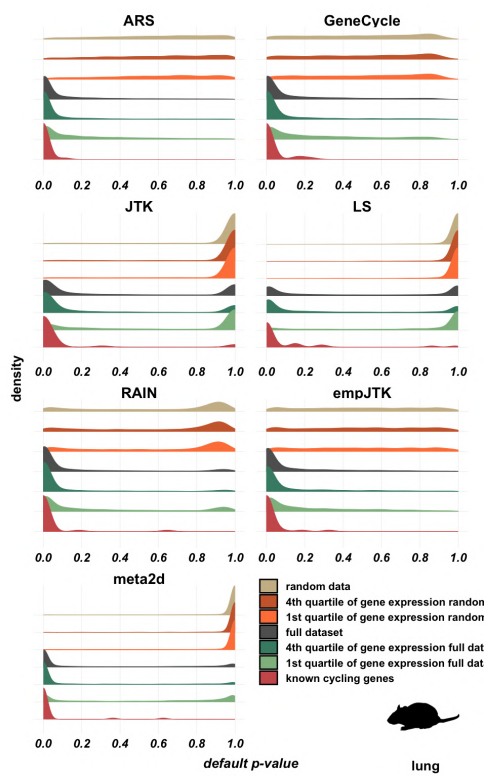

Fig. S38

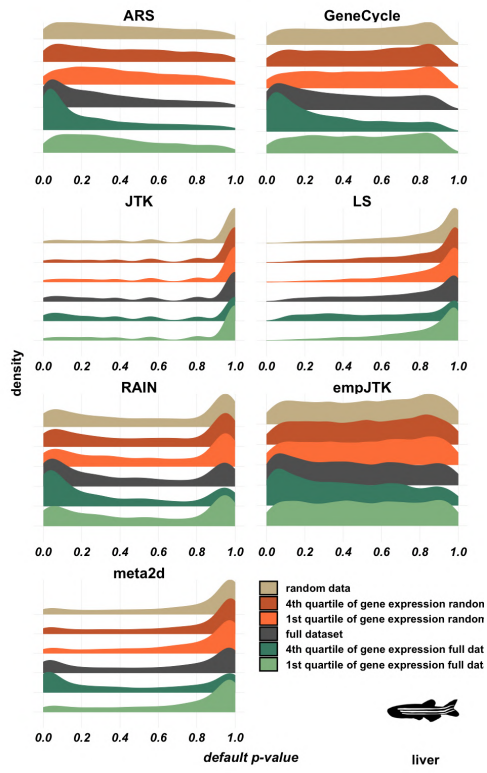

Fig. S39

raw  $p$ -values

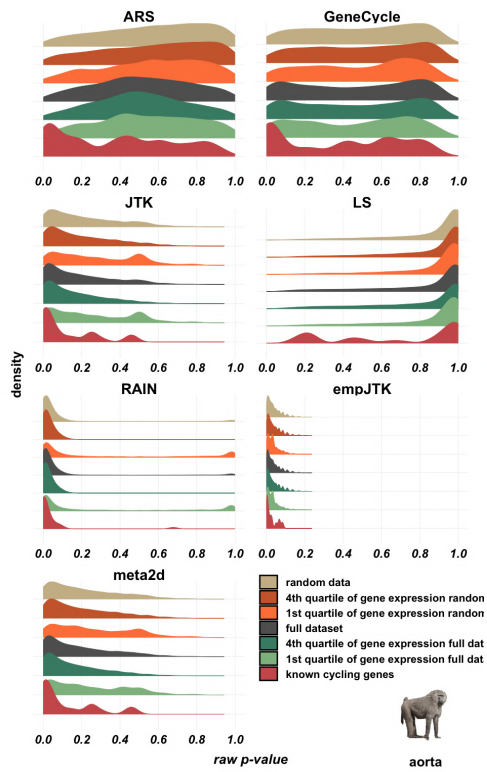

Fig. S40

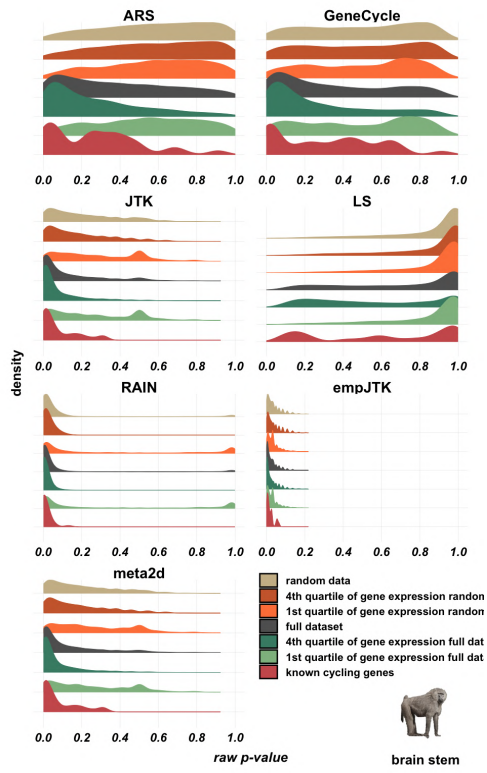

Fig. S41

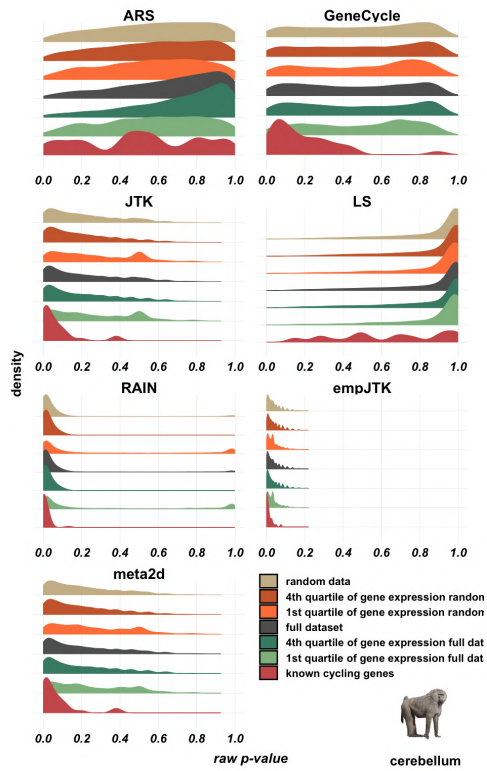

Fig. S42

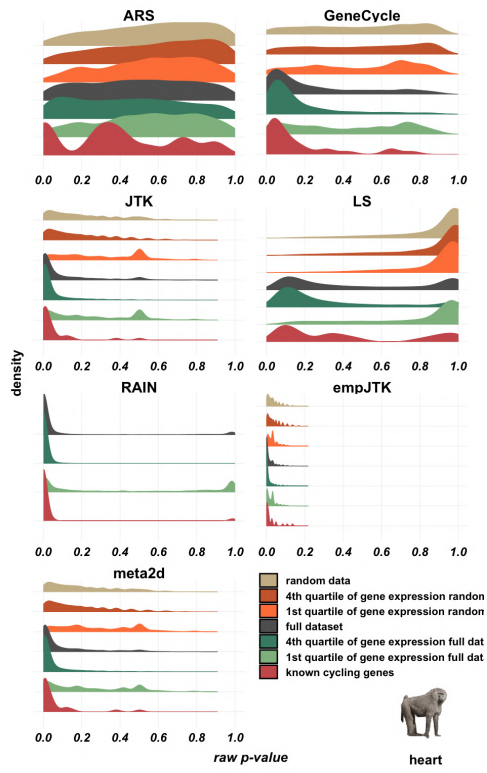

Fig. S43

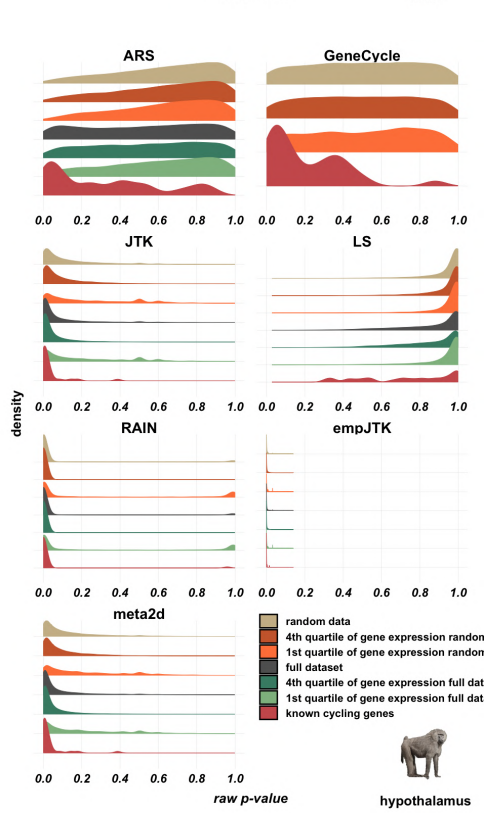

Fig. S44

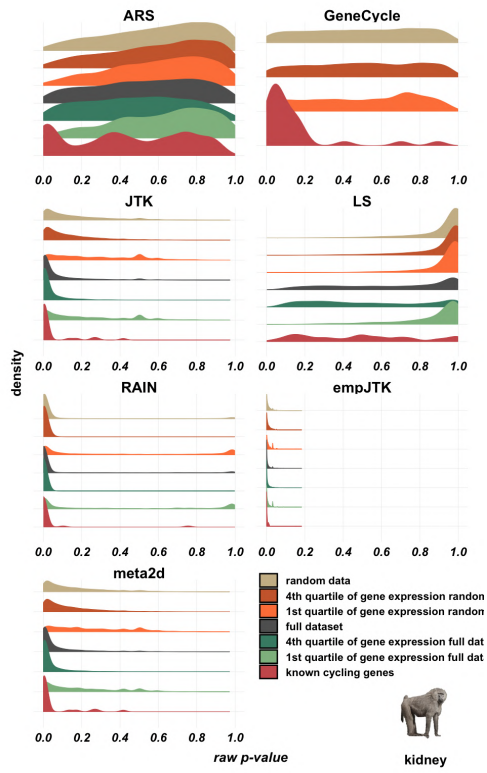

Fig. S45

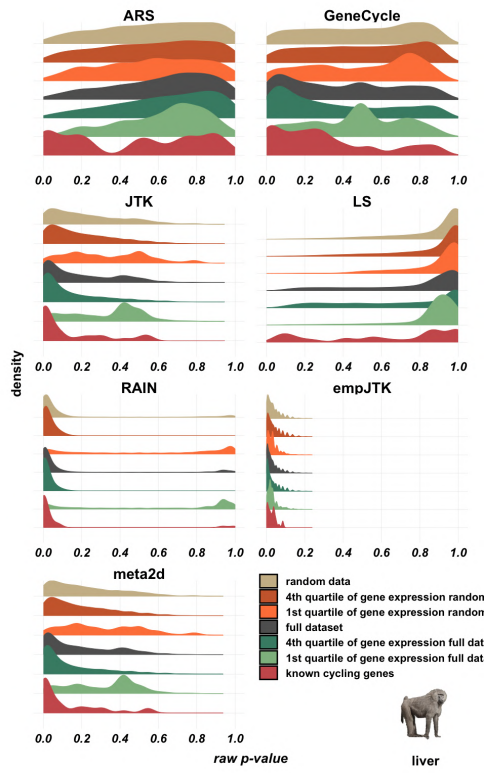

Fig. S46

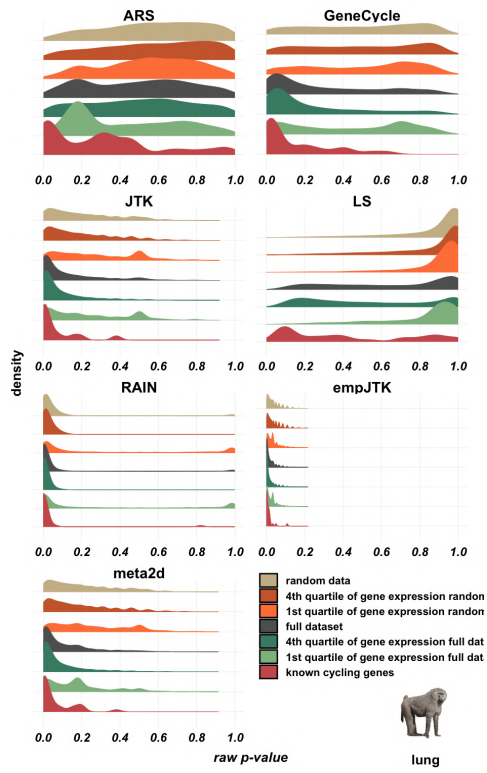

Fig. S47

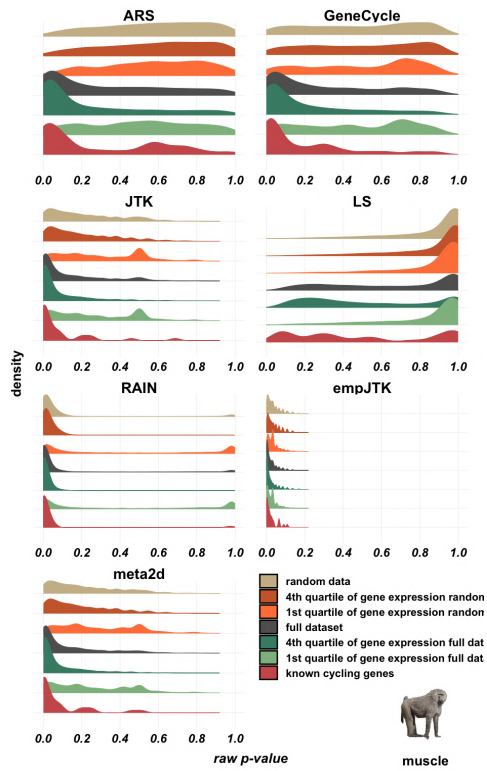

Fig. S48



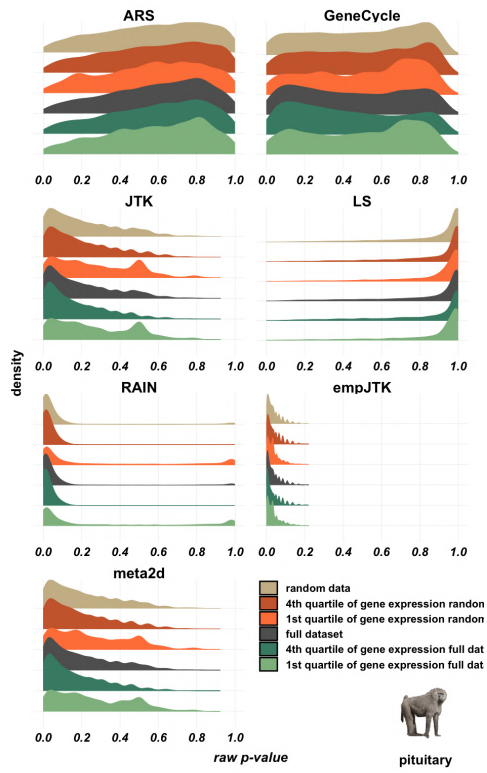

Fig. S49

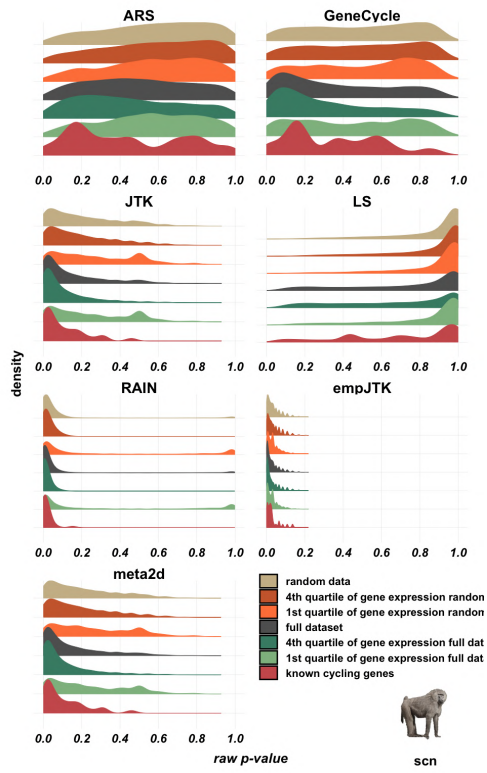

Fig. S50

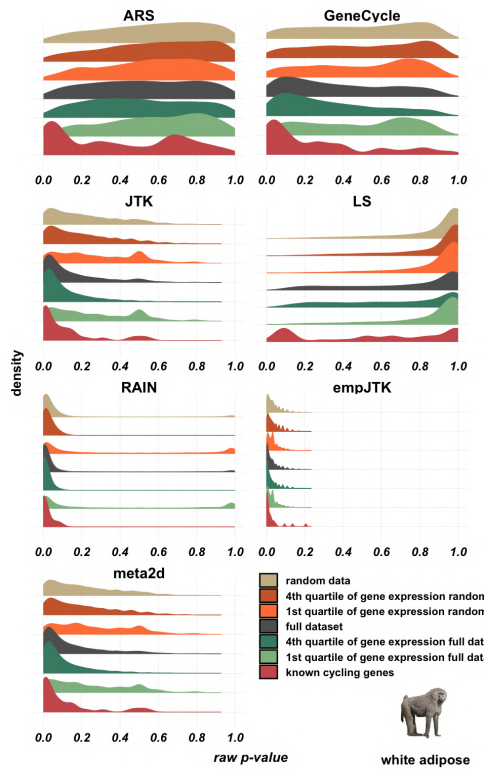

Fig. S51

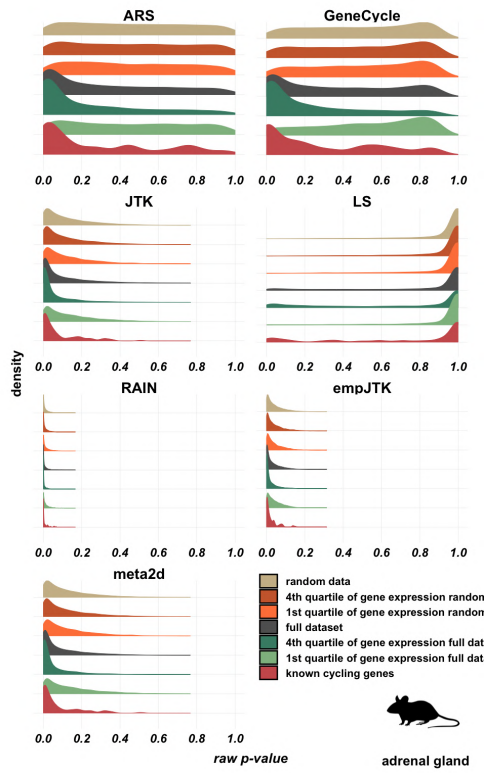

Fig. S52

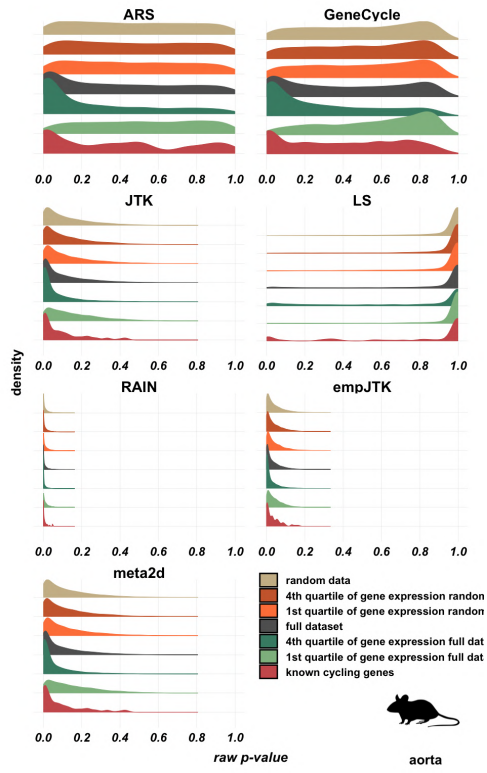

Fig. S53

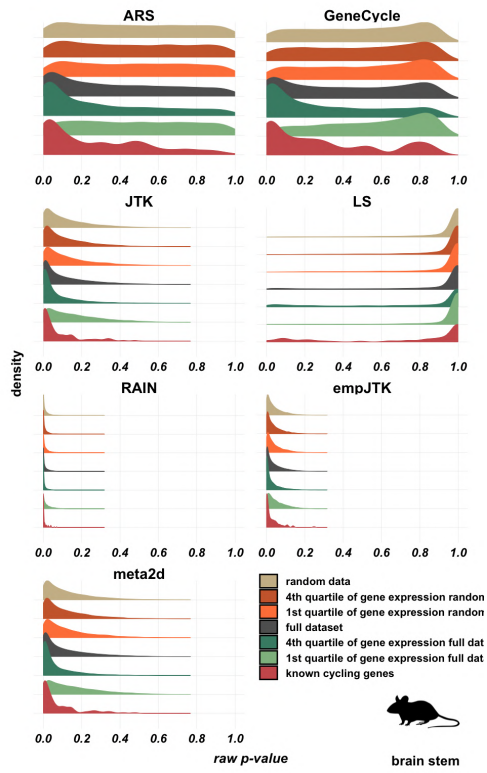

Fig. S54

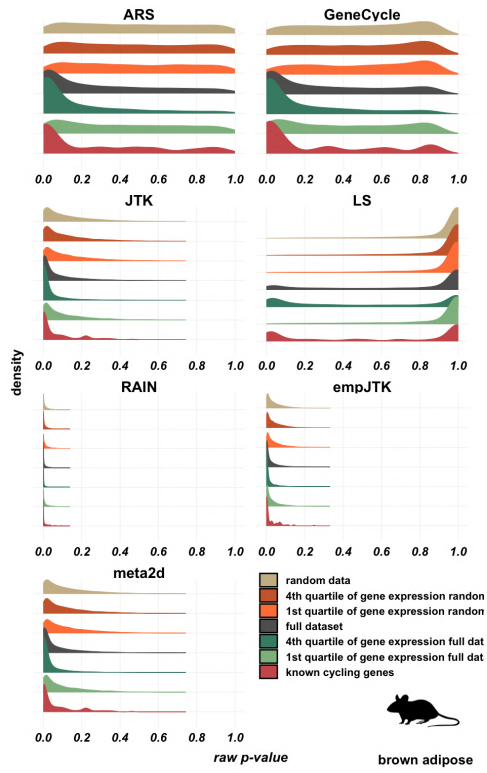

Fig. S55

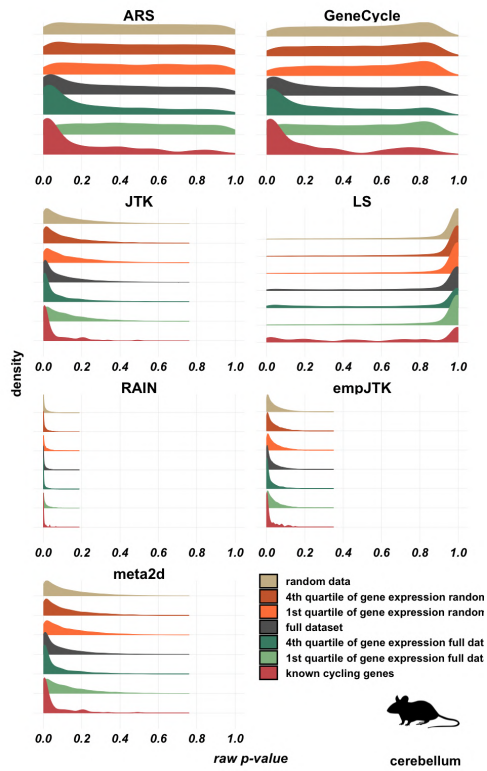

Fig. S56

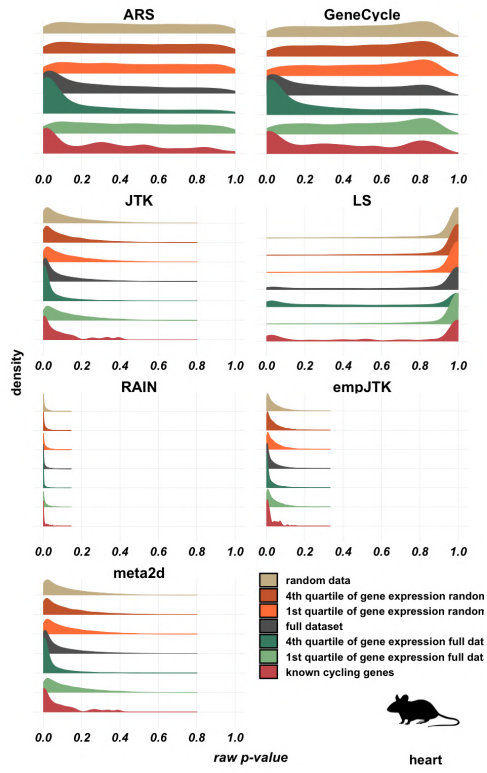

Fig. S57

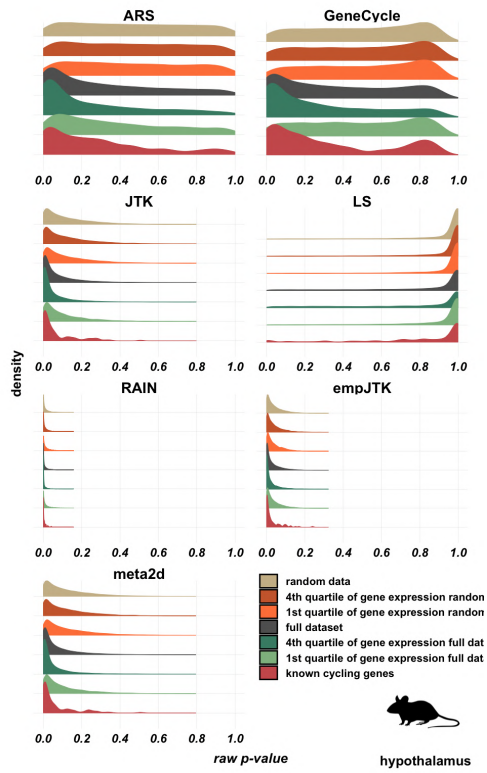

Fig. S58

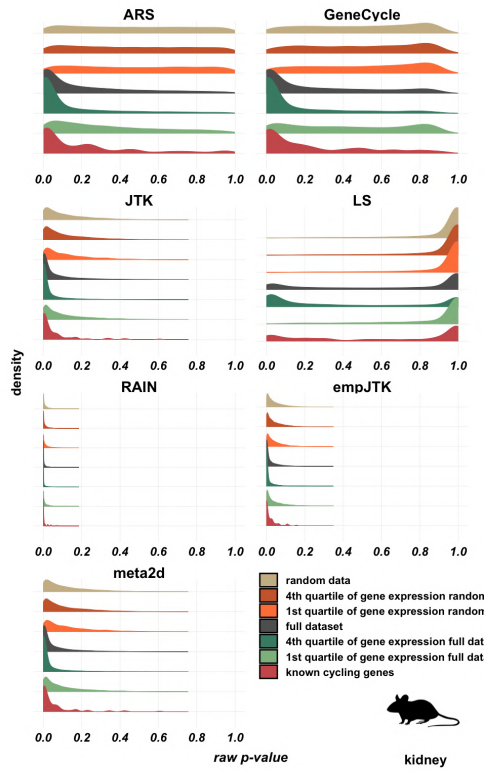

Fig. S59

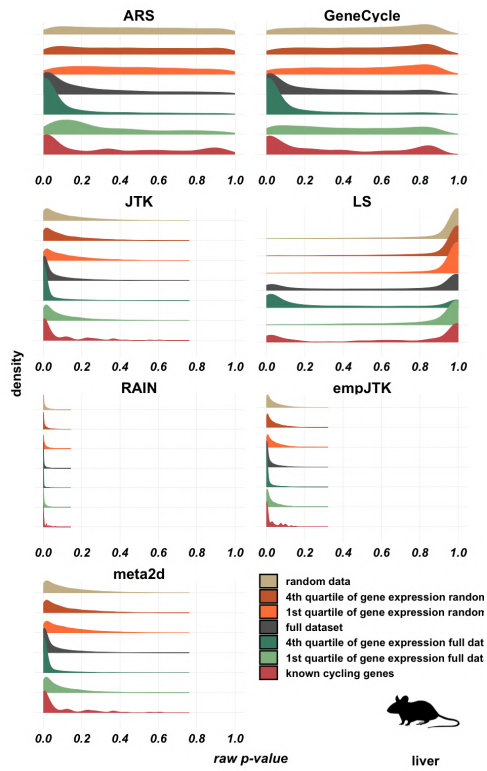

Fig. S60

**Images credit:** Anthony Caravaggi (mouse), Ian Quigley (zebrafish) both license CC BY-NC-SA 3.0, Wikipedia GNU GPL Muhammad Mahdi Karim (baboon), and Public Domain for other images (from <http://phylopic.org/>)
