# Supplementary material for: Methods detecting rhythmic gene expression are biologically relevant only for strong signal
Source: PubMed Central journal article supplement (PMC7100990; doi:10.1371/journal.pcbi.1007666), 2020-03-17
Supplement: pcbi.1007666.s004.pdf [file pcbi.1007666.s004.pdf]

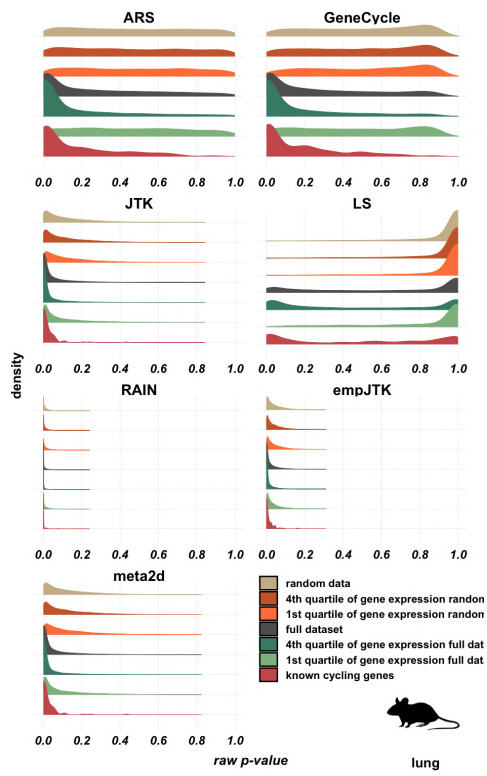

Fig. S61

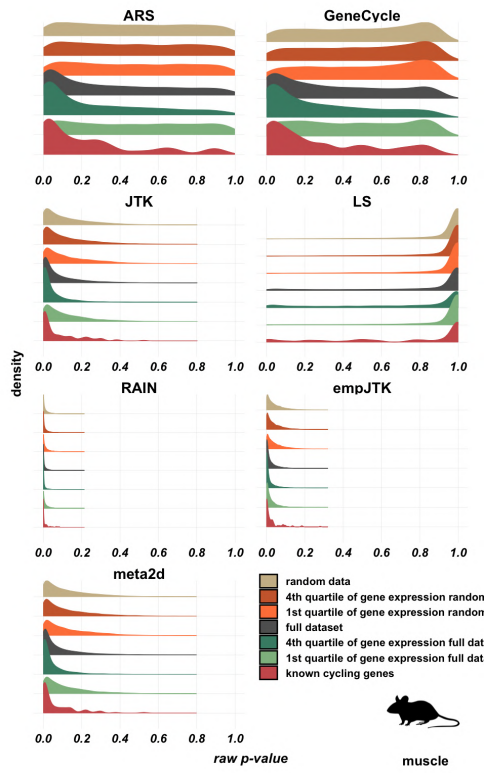

Fig. S62

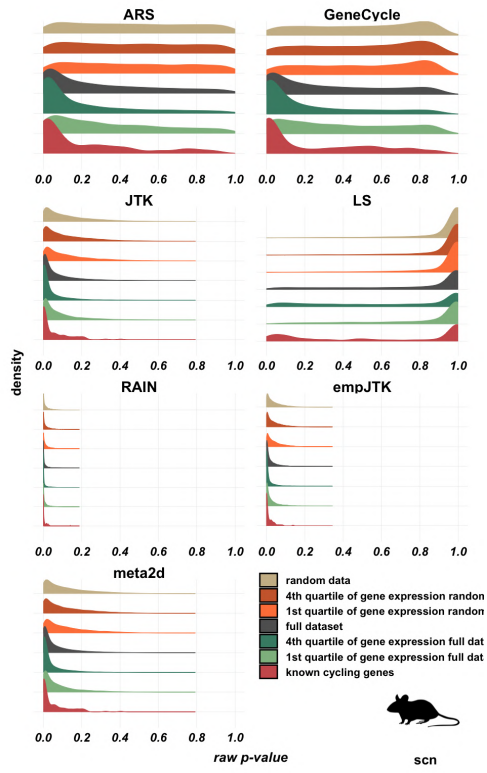

Fig. S63

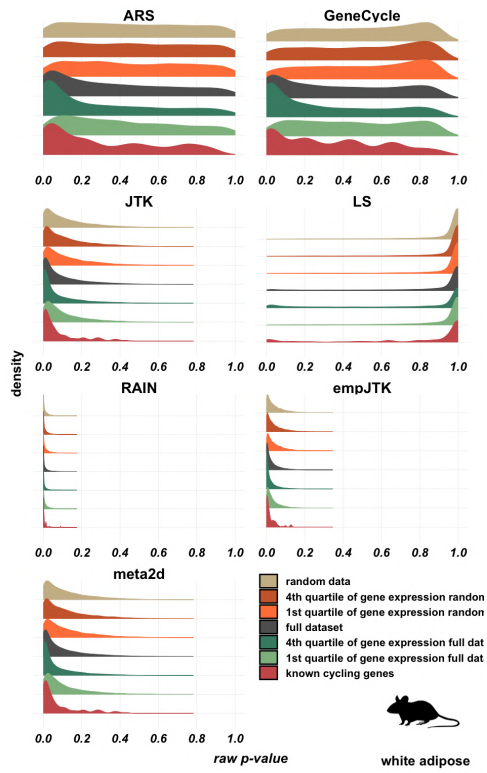

Fig. S64

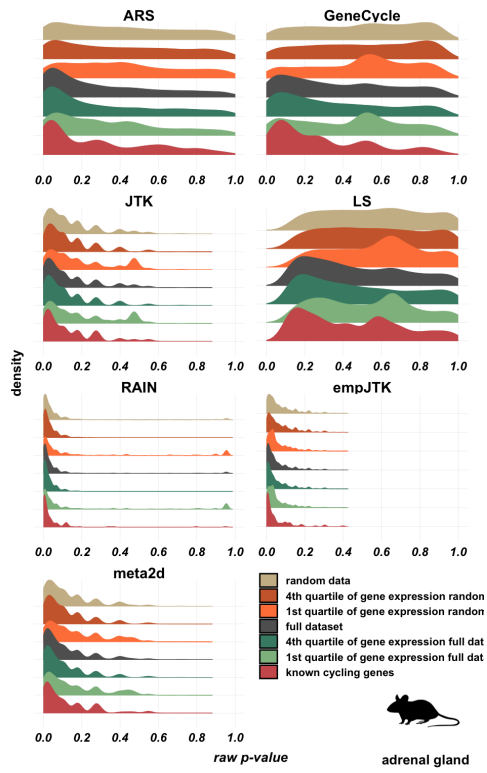

Fig. S65

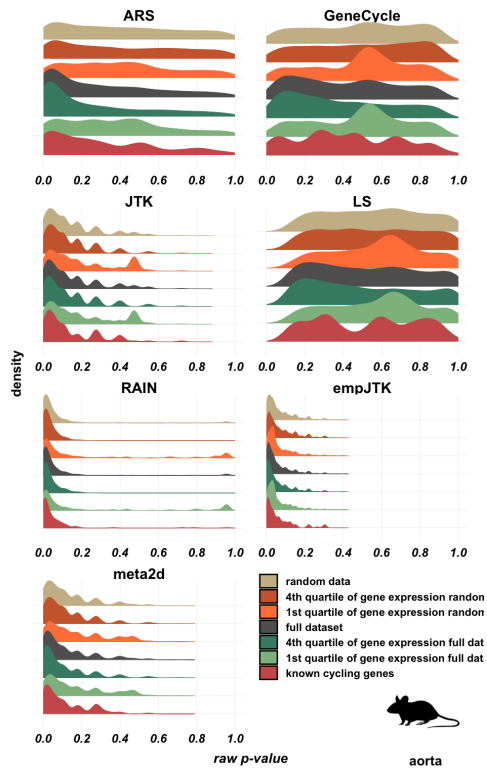

Fig. S66

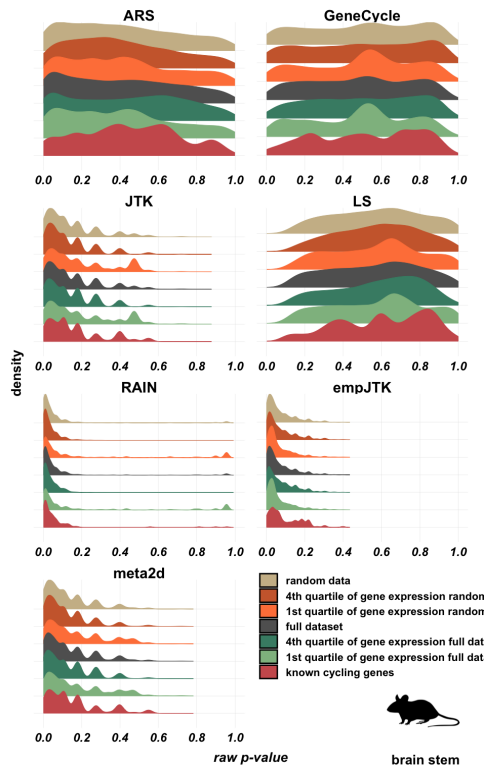

Fig. S67

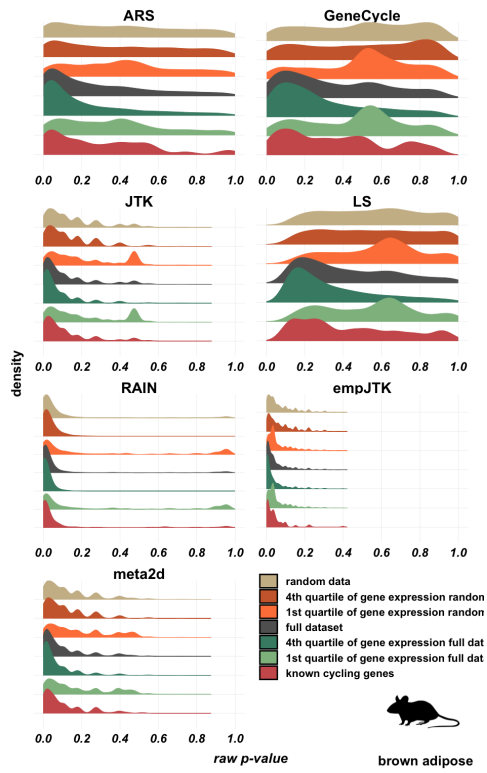

Fig. S68

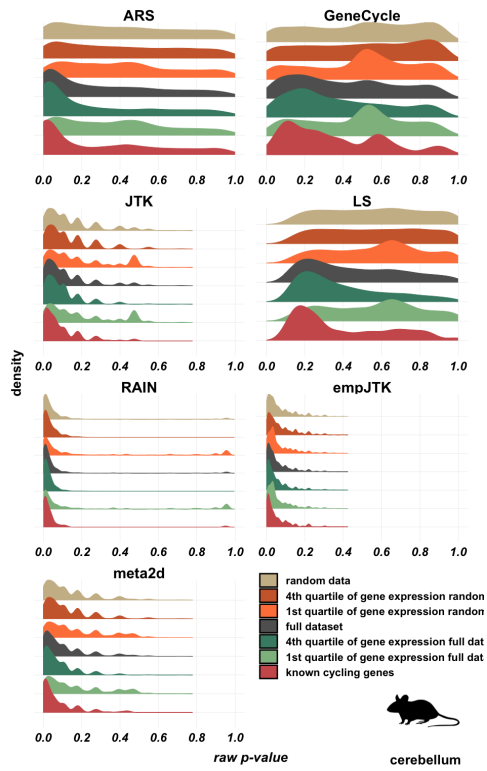

Fig. S69

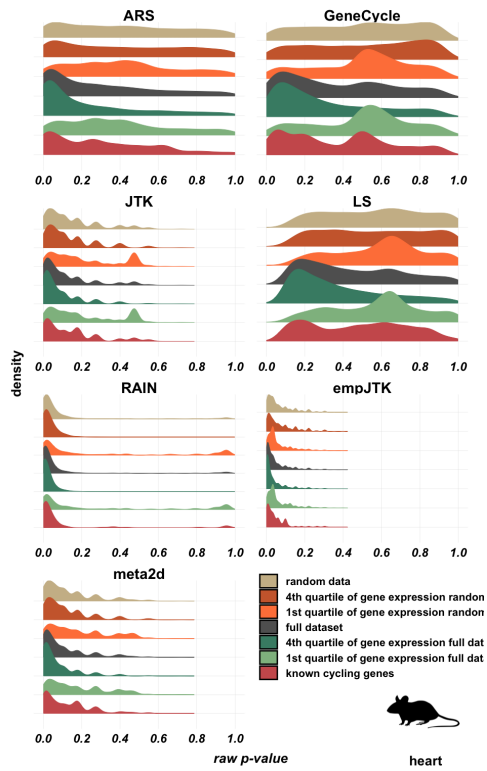

Fig. S70

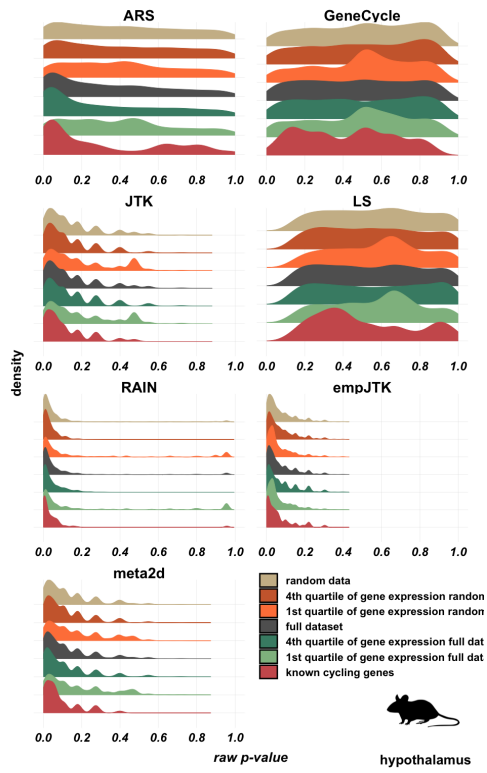

Fig. S71

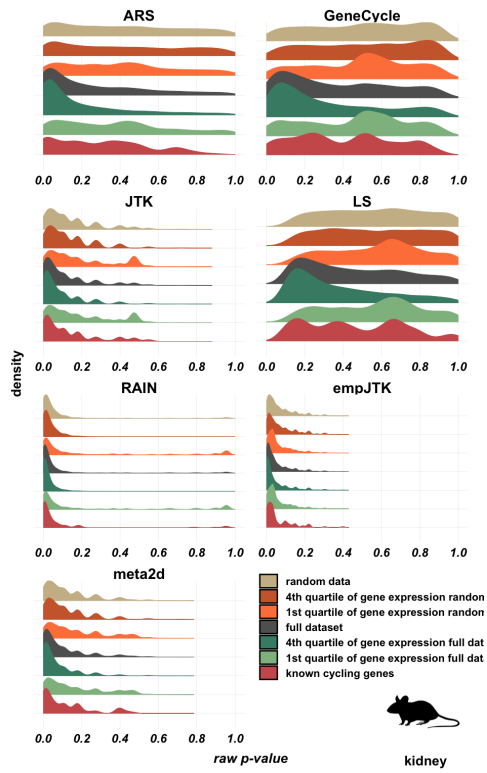

Fig. S72

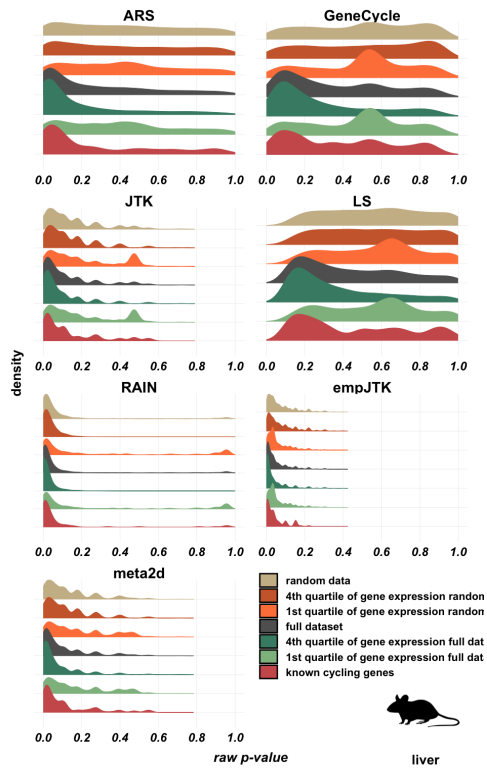

Fig. S73

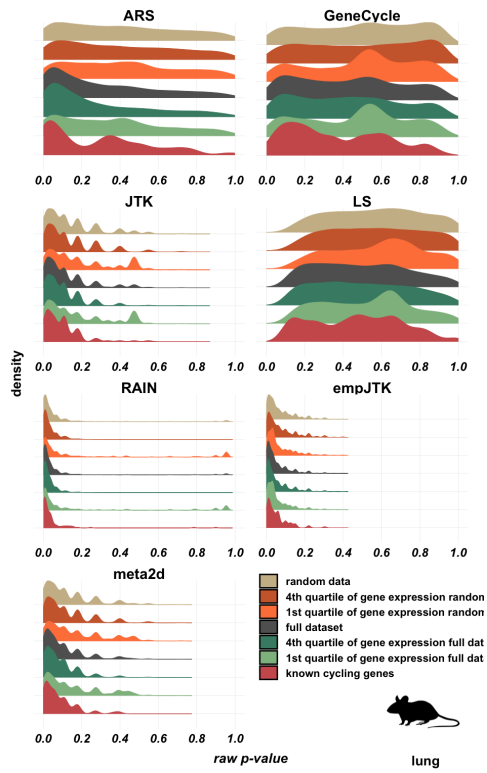

Fig. S74

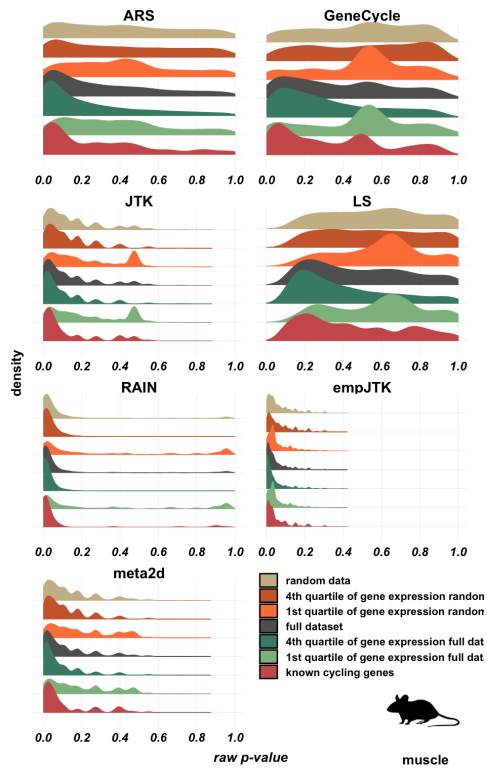

Fig. S75

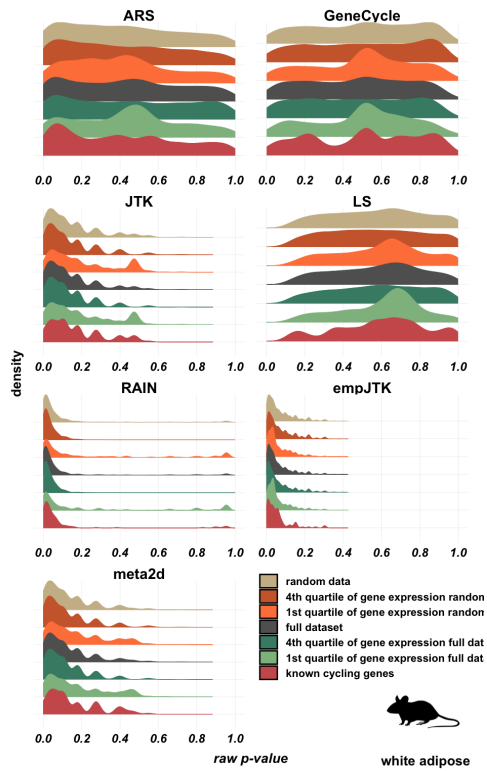

Fig. S76



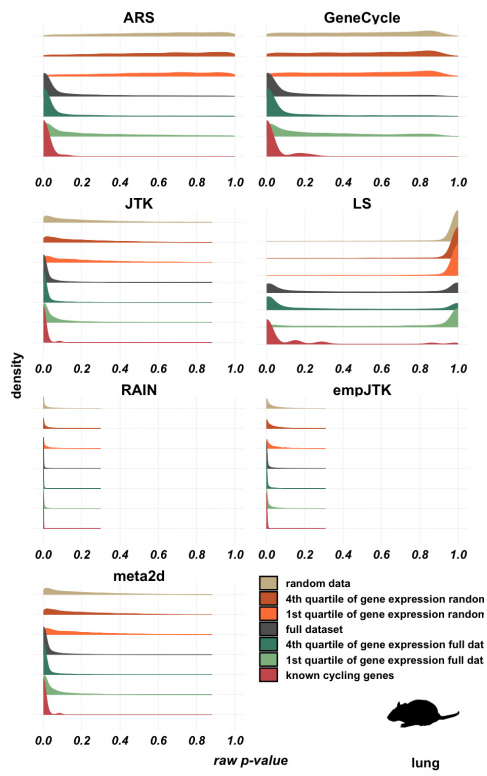

Fig. S77

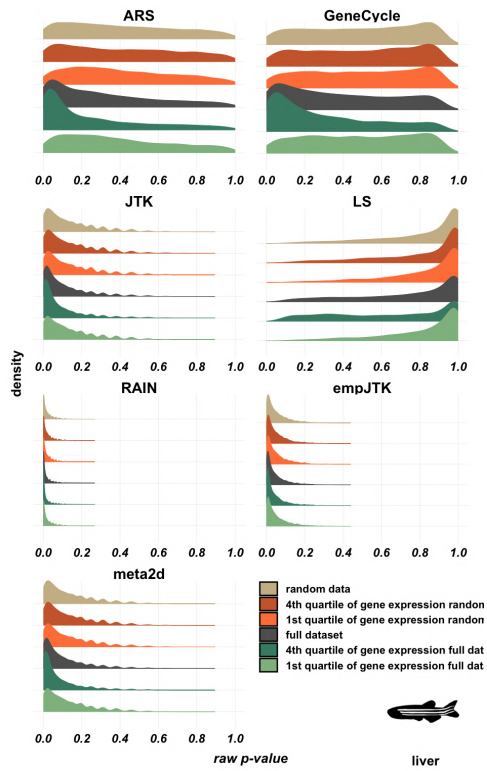

Fig. S78

BH.Q

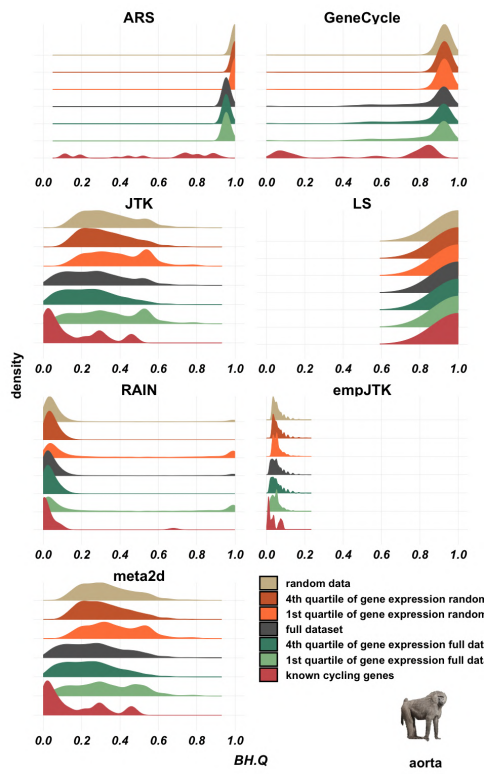

Fig. S78

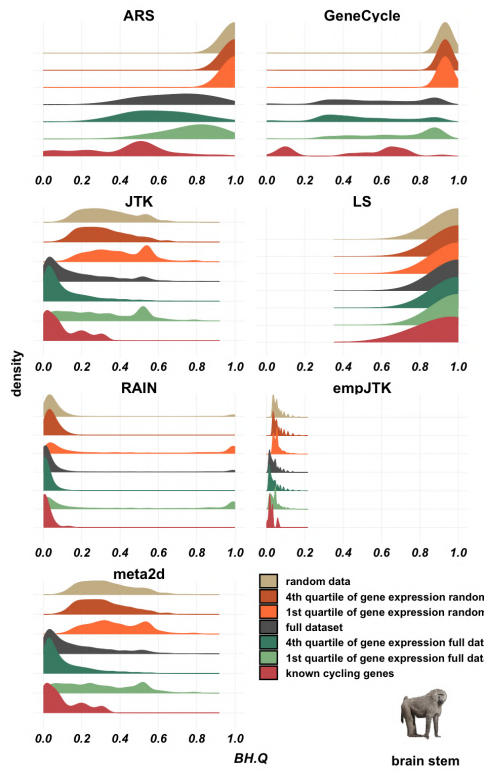

Fig. S78



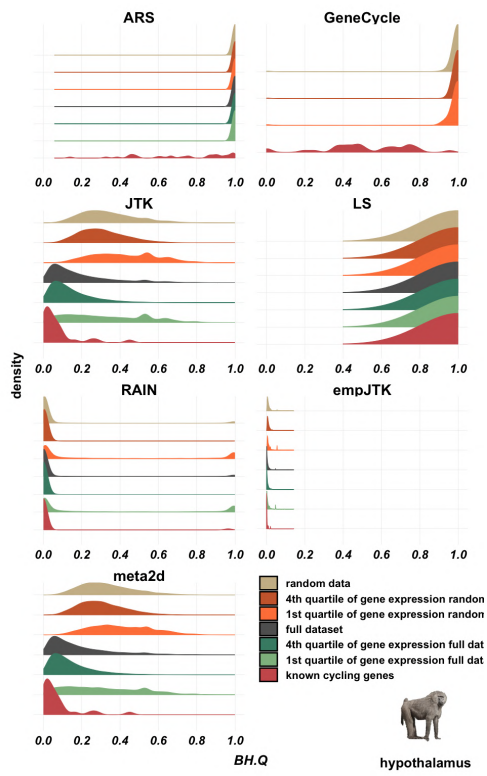

Fig. S78

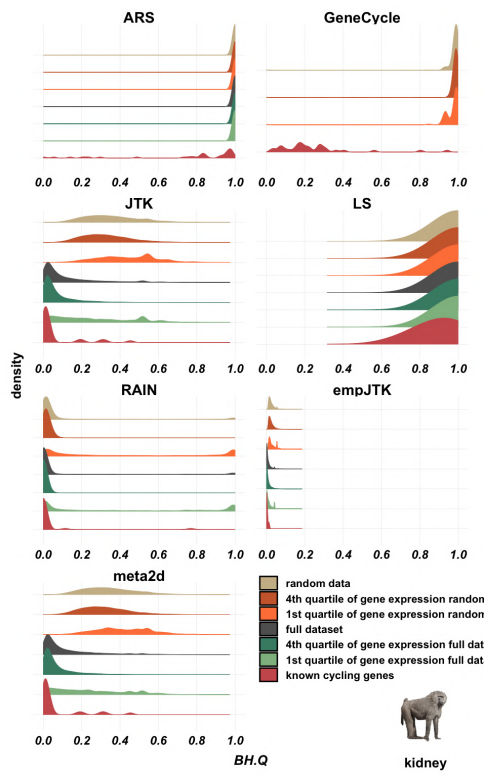

Fig. S78



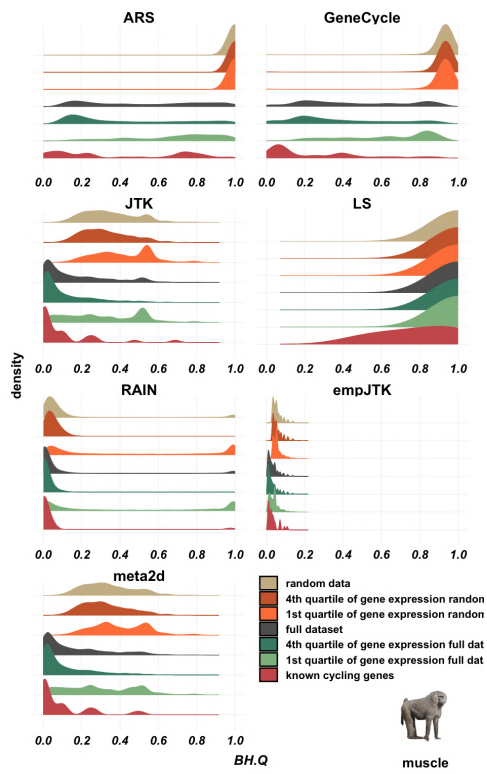

Fig. S78

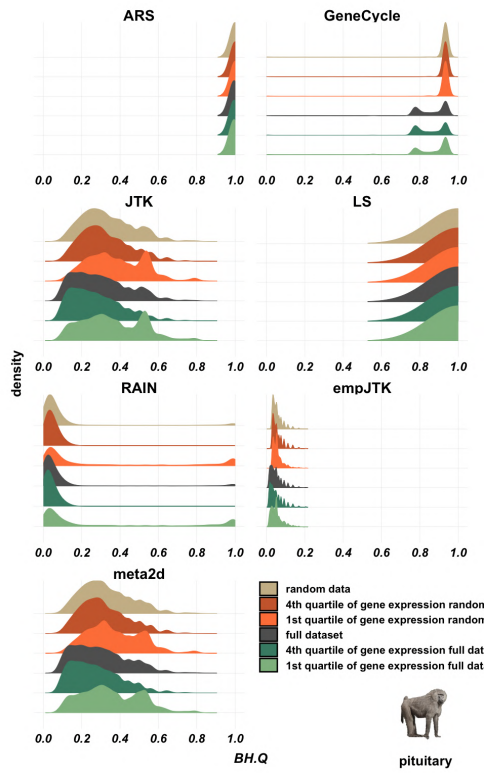

Fig. S78

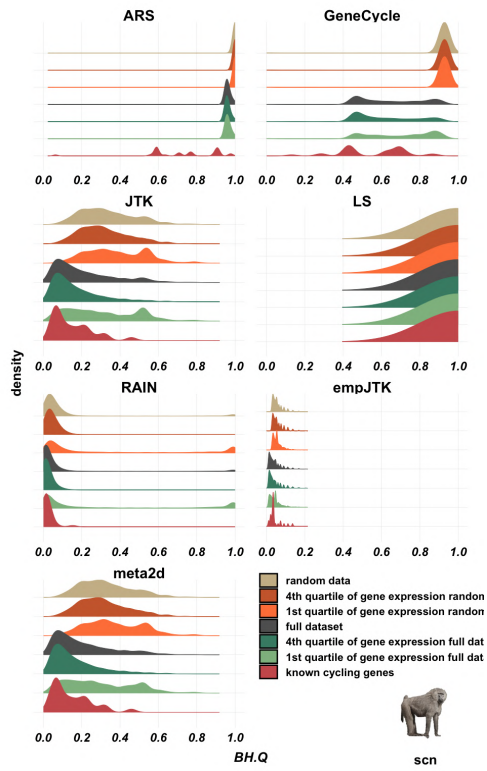

Fig. S78

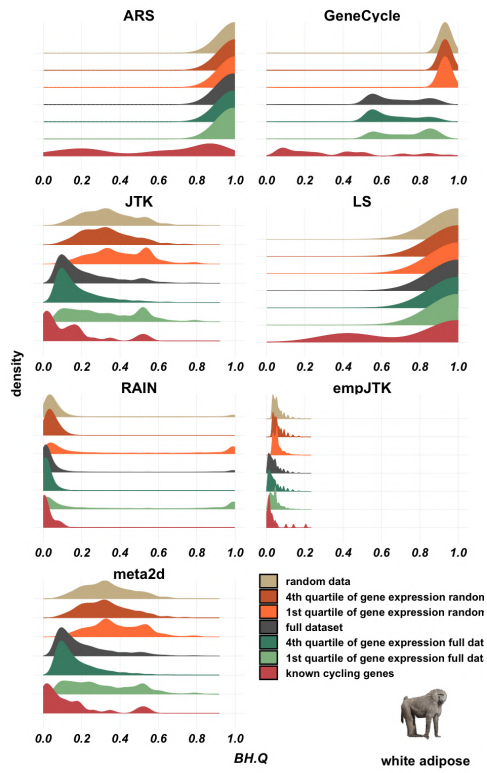

Fig. S78

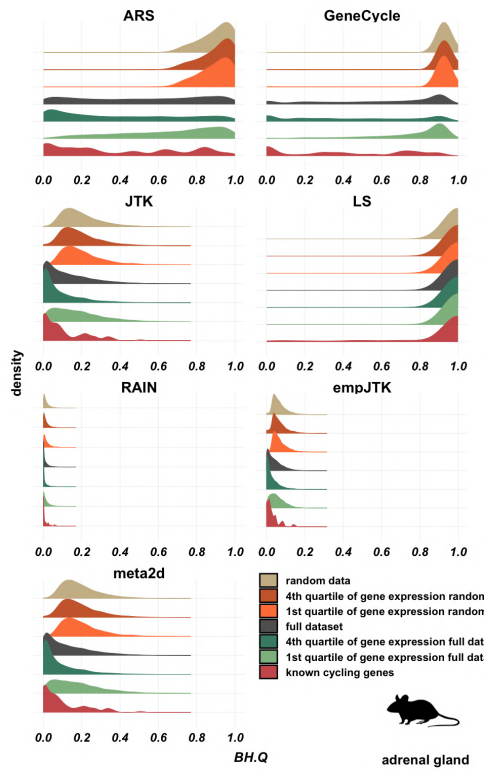

Fig. S78

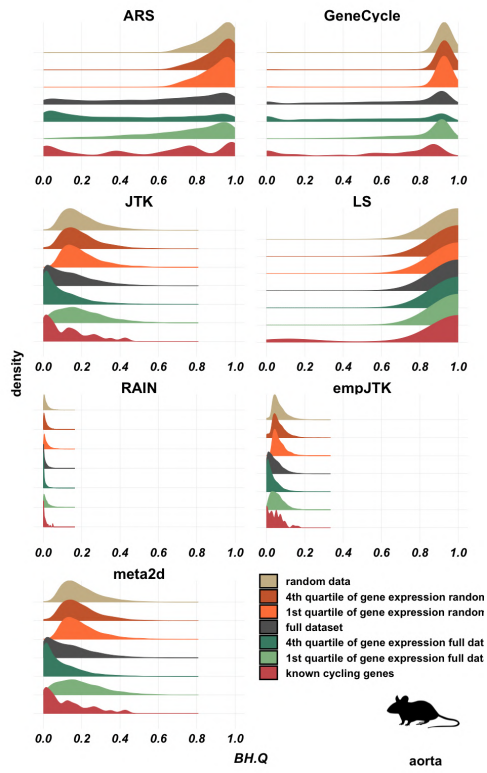

Fig. S78



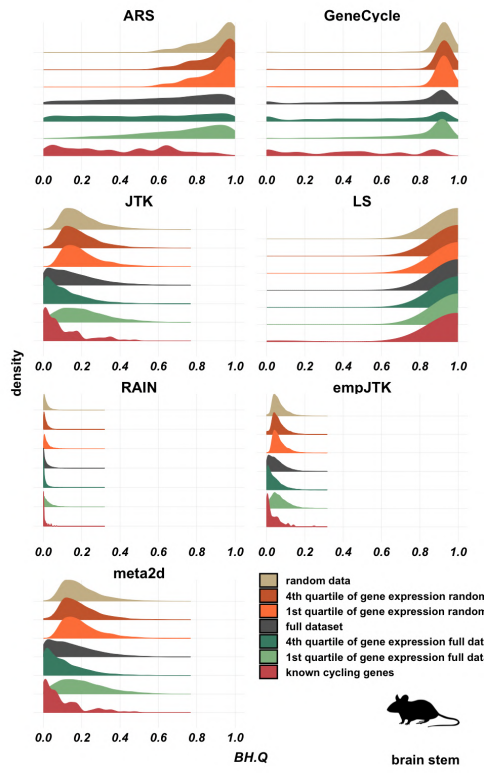

Fig. S78

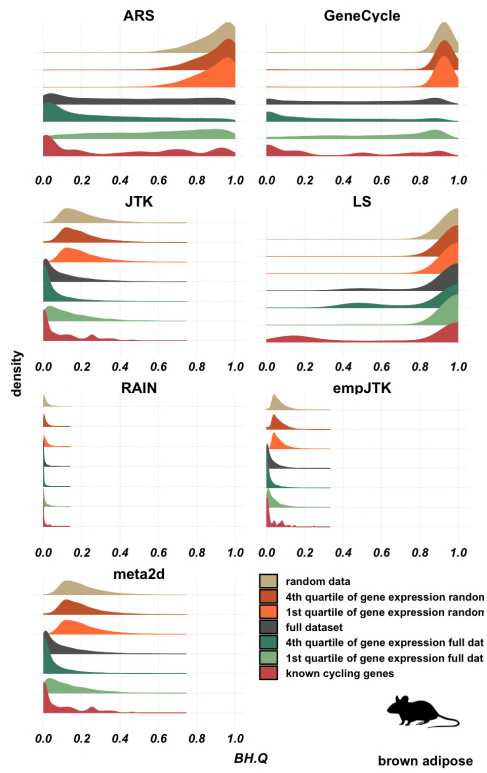

Fig. S78

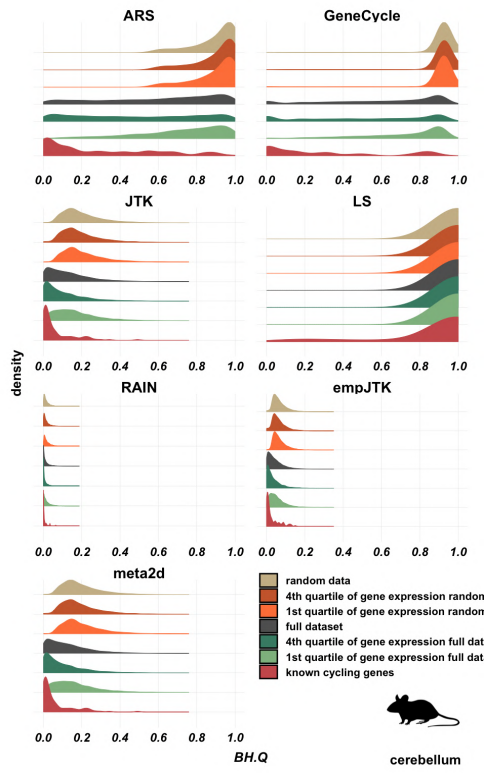

Fig. S78

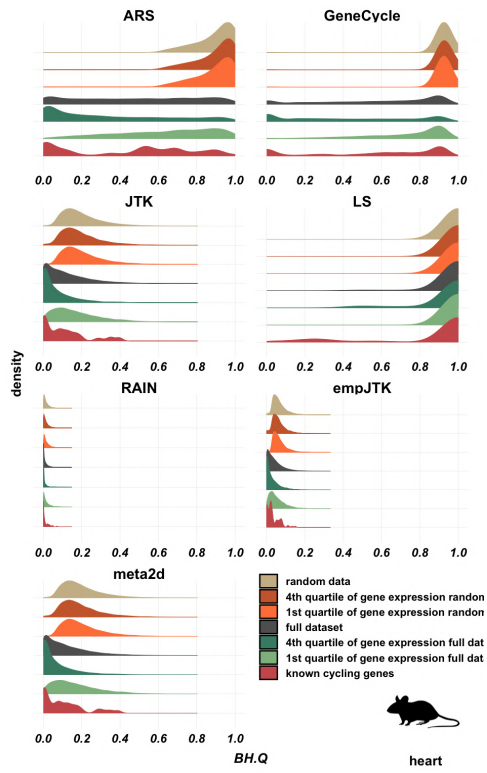

Fig. S78

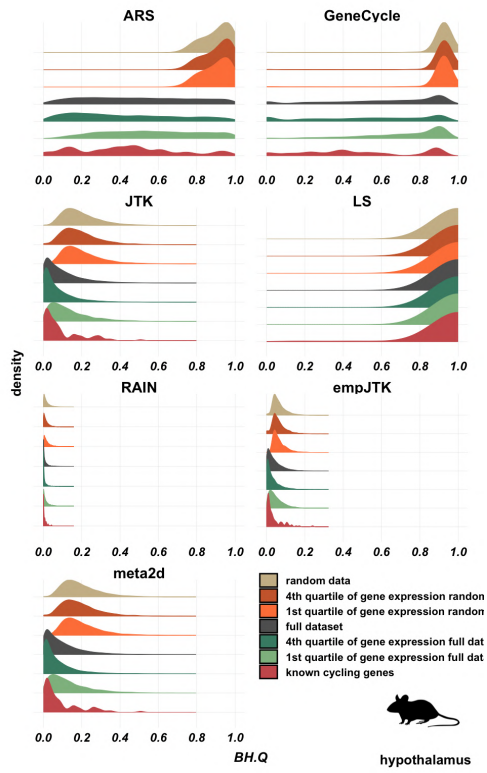

Fig. S78

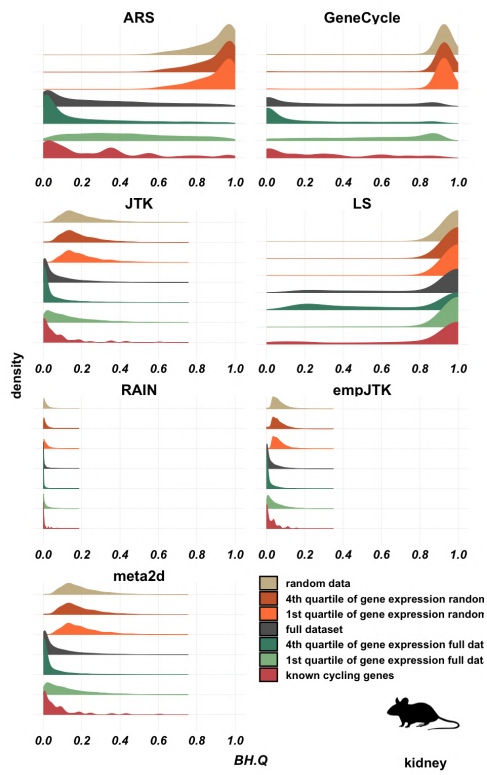

Fig. S78



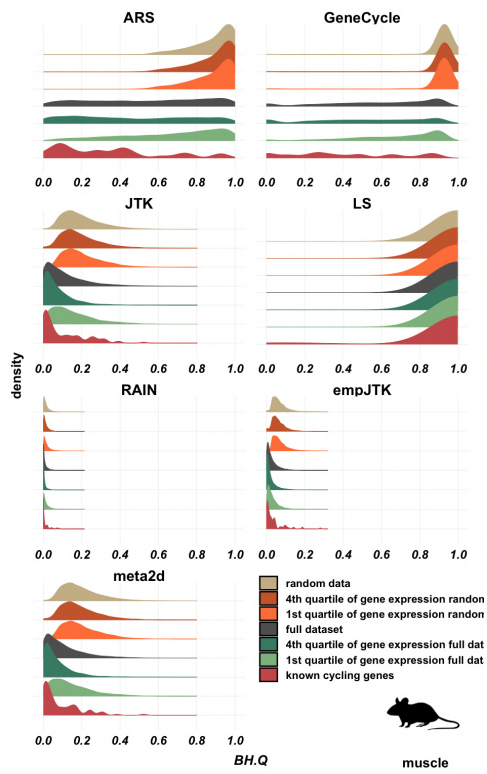

Fig. S78

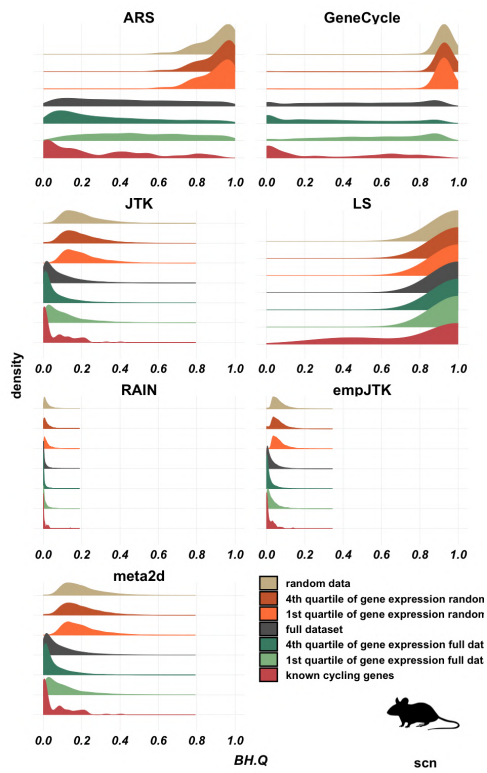

Fig. S78

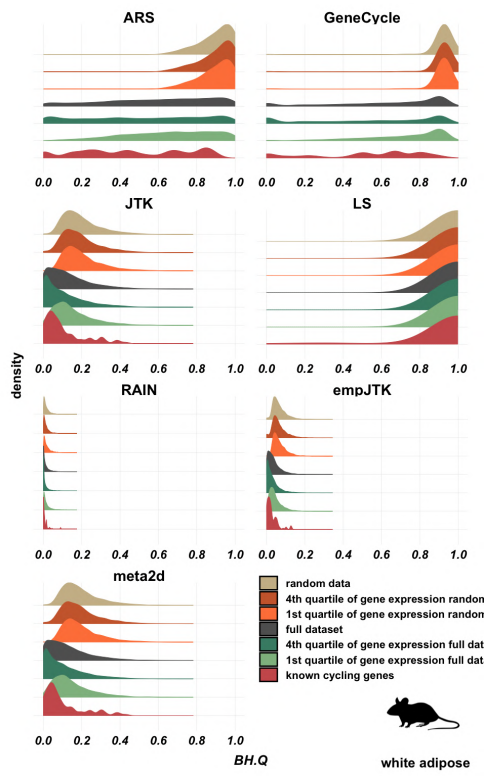

Fig. S78

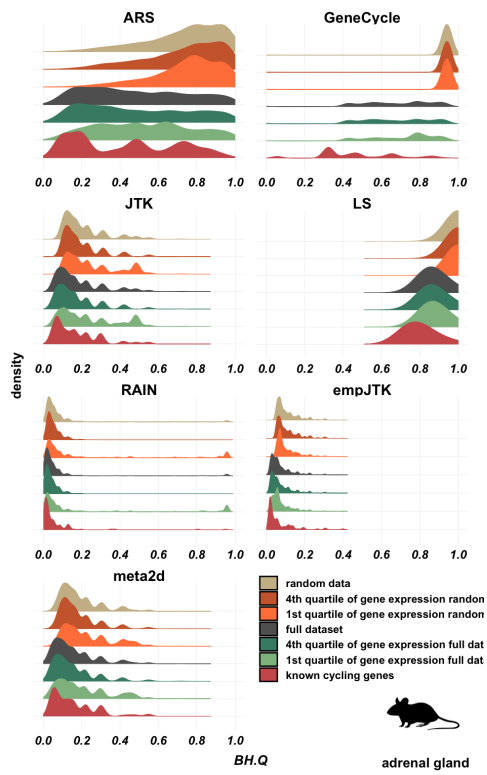

Fig. S78

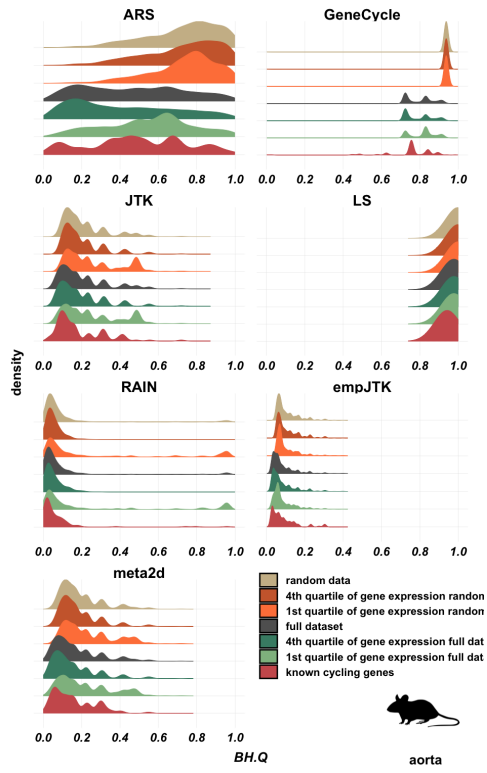

Fig. S78

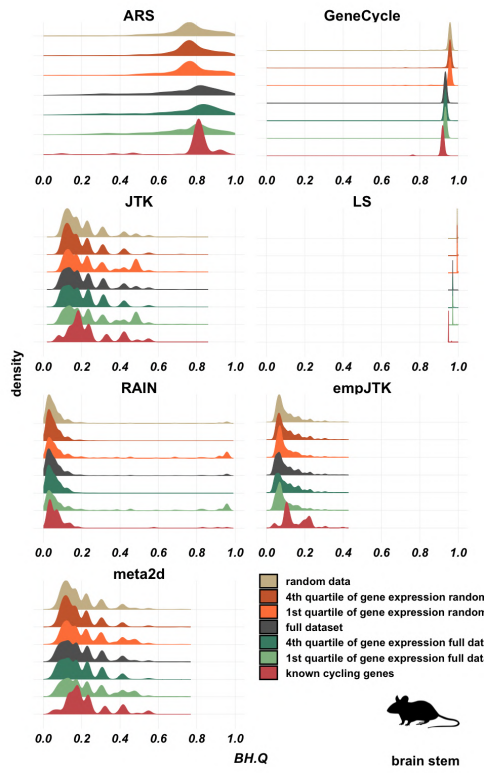

Fig. S78

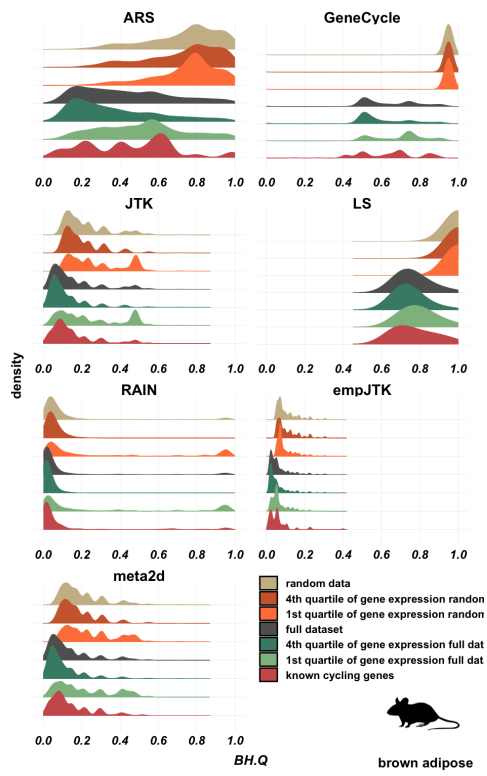

Fig. S78

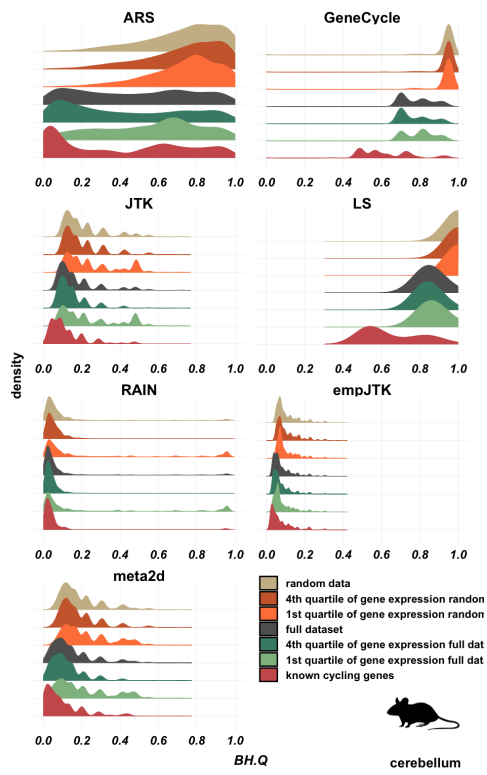

Fig. S78



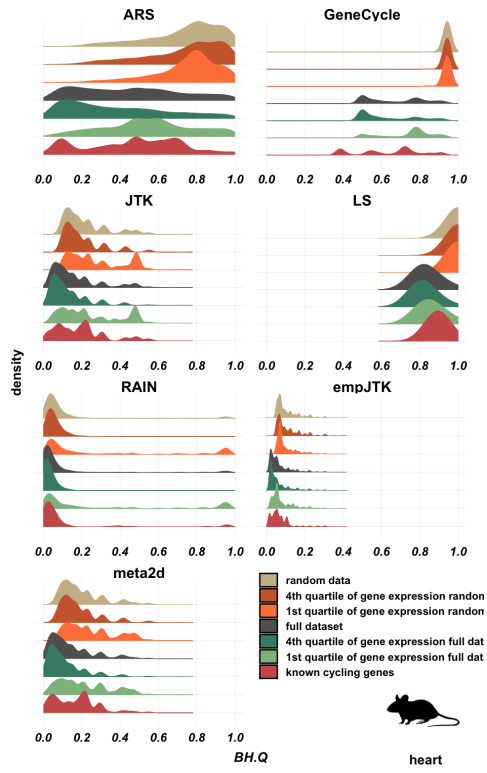

Fig. S78

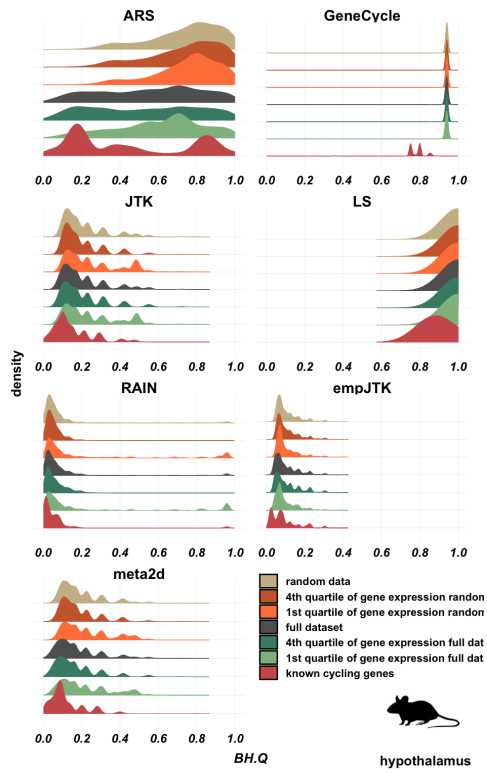

Fig. S78



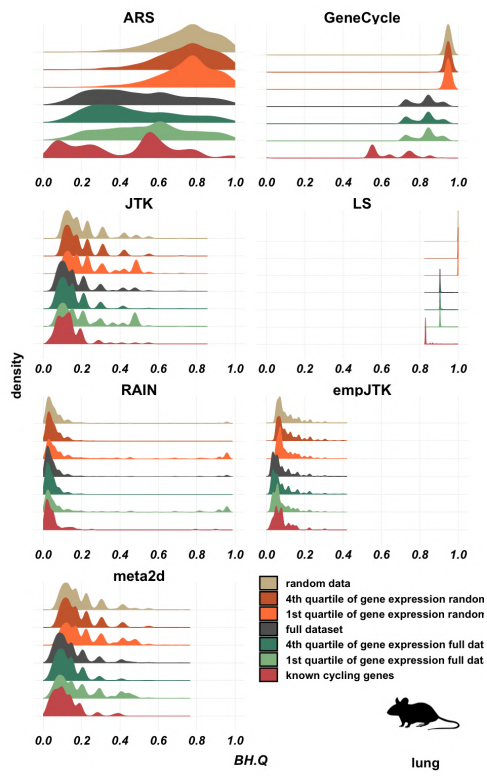

Fig. S78

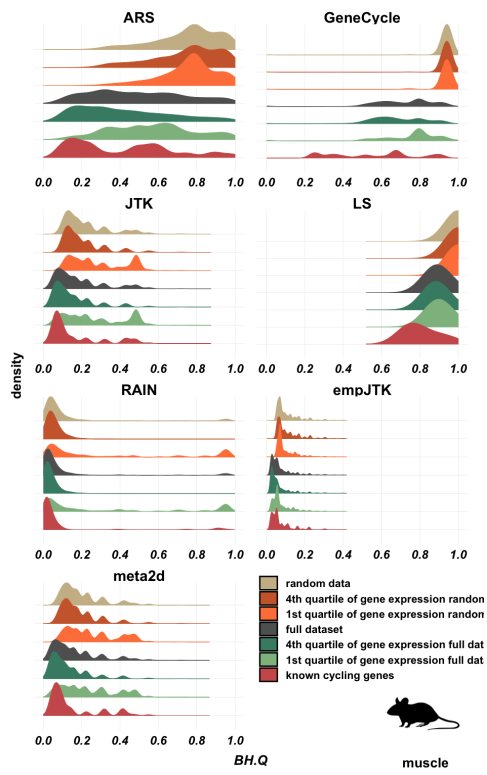

Fig. S78

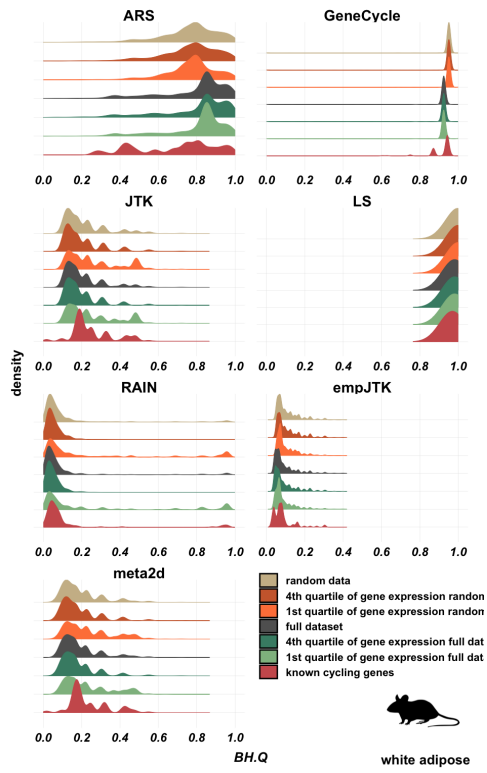

Fig. S78

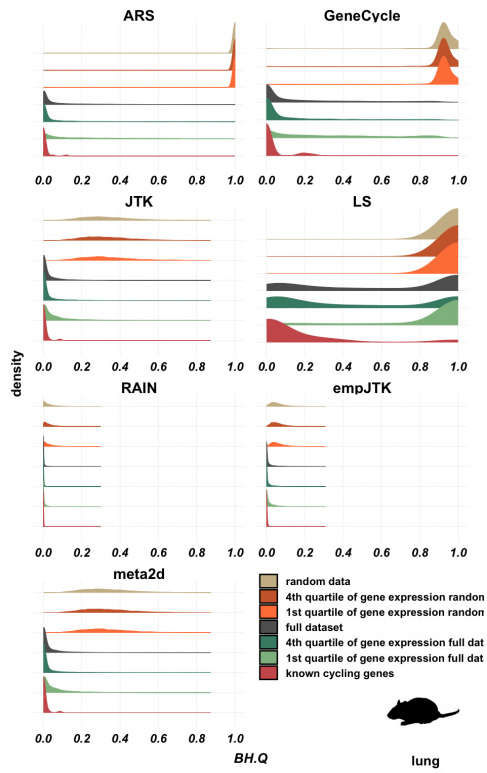

Fig. S78

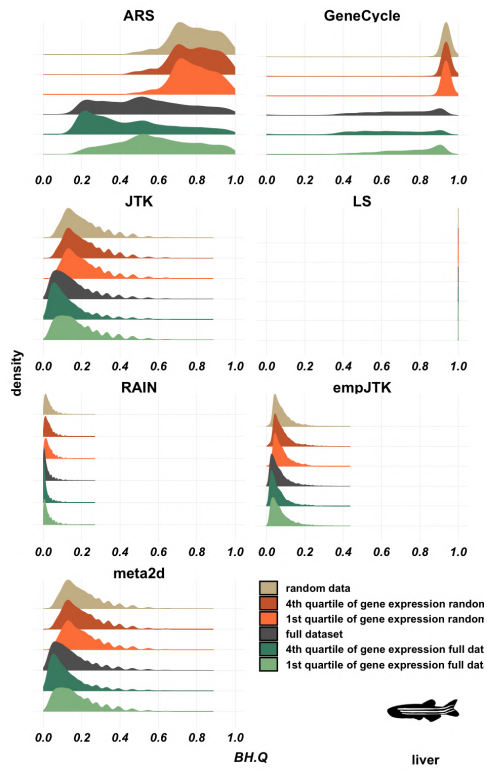

Fig. S78

**Images credit:** Anthony Caravaggi (mouse), Ian Quigley (zebrafish) both license CC BY-NC-SA 3.0, Wikipedia GNU GPL Muhammad Mahdi Karim (baboon), and Public Domain for other images (from <http://phylopic.org/>)
