# Supplementary material for: Methods detecting rhythmic gene expression are biologically relevant only for strong signal
Source: PubMed Central journal article supplement (PMC7100990; doi:10.1371/journal.pcbi.1007666), 2020-03-17
Supplement: pcbi.1007666.s006.pdf [file pcbi.1007666.s006.pdf]

# VERTEBRATES

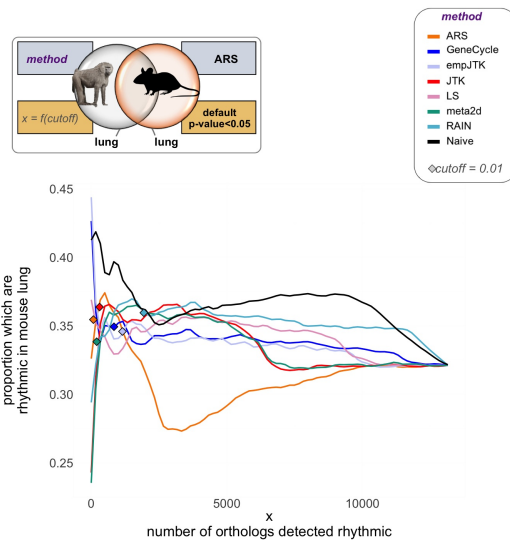

Fig. S1

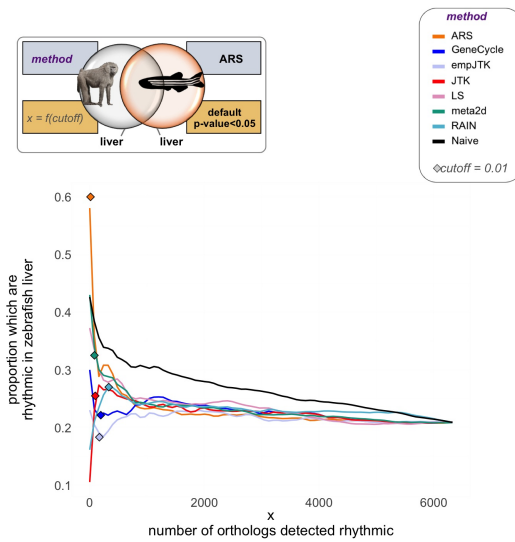

Fig. S2

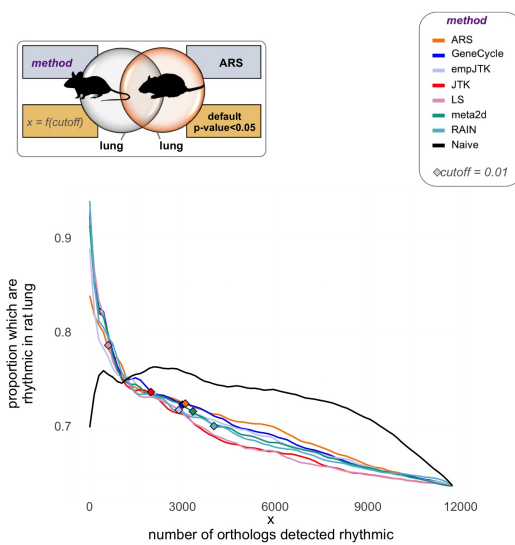

Fig. S3

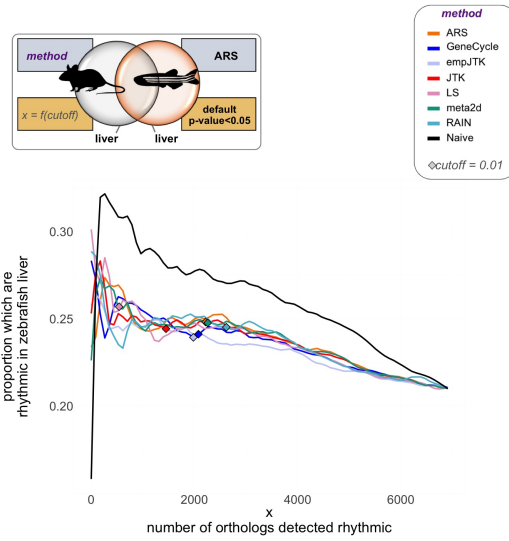

Fig. S4

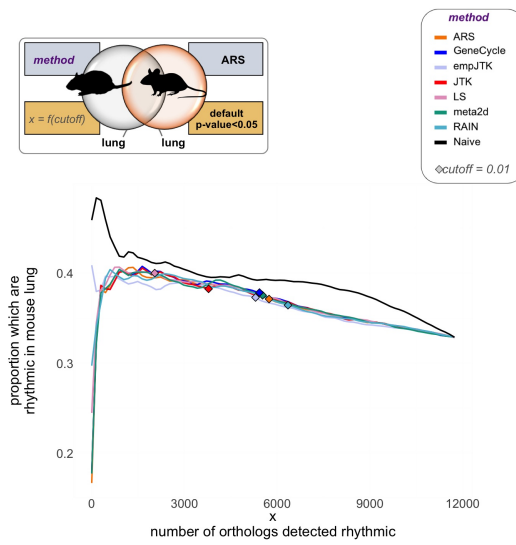

Fig. S5

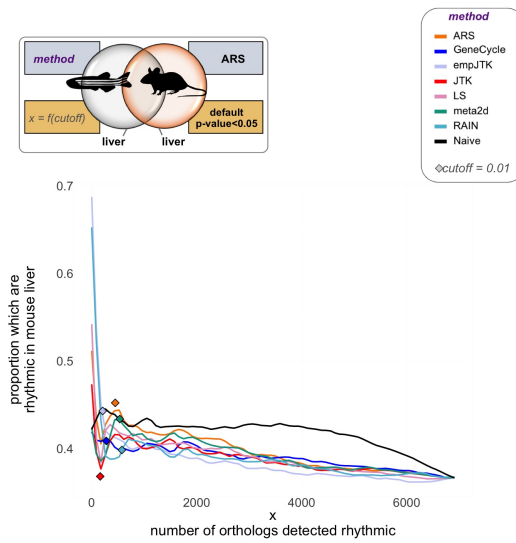

Fig. S6

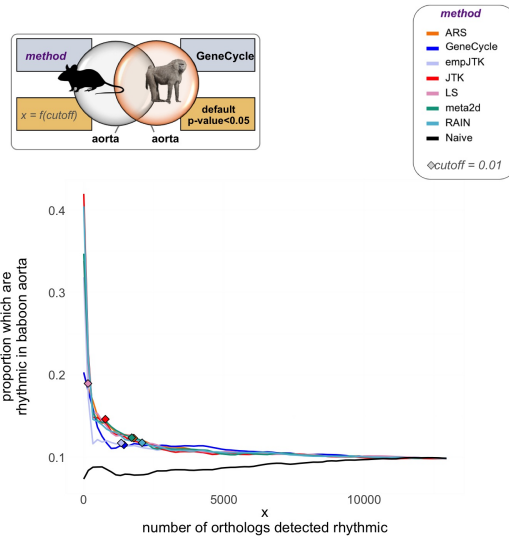

Fig. S7

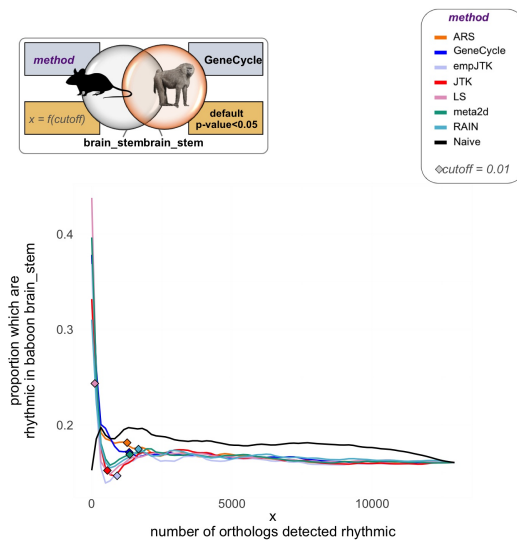

Fig. S8

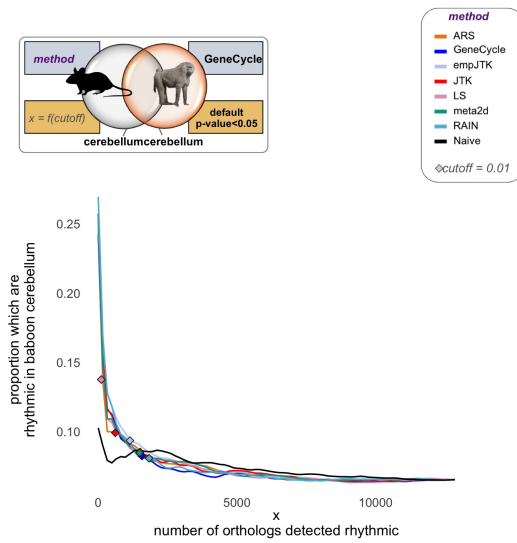

Fig. S9

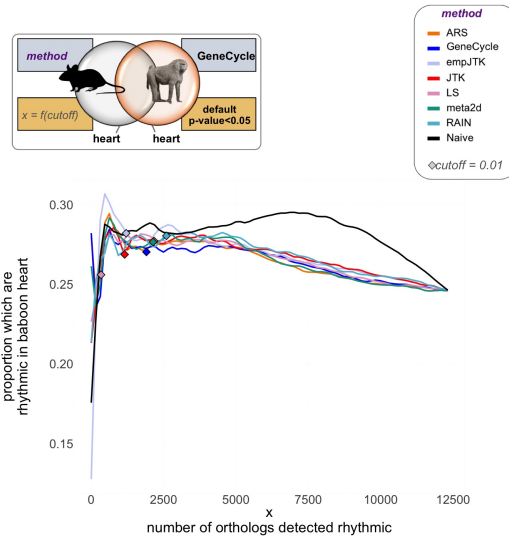

Fig. S10

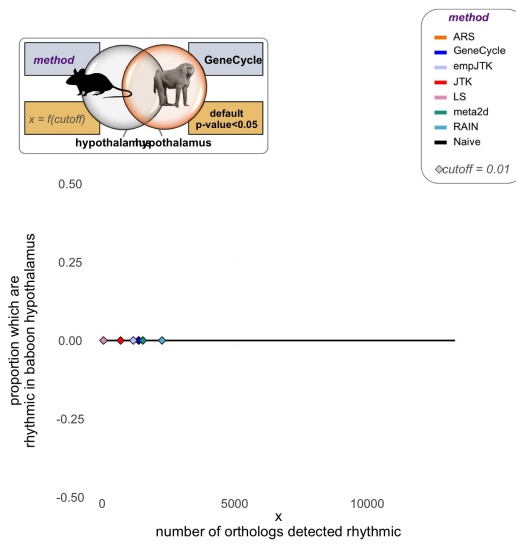

Fig. S11

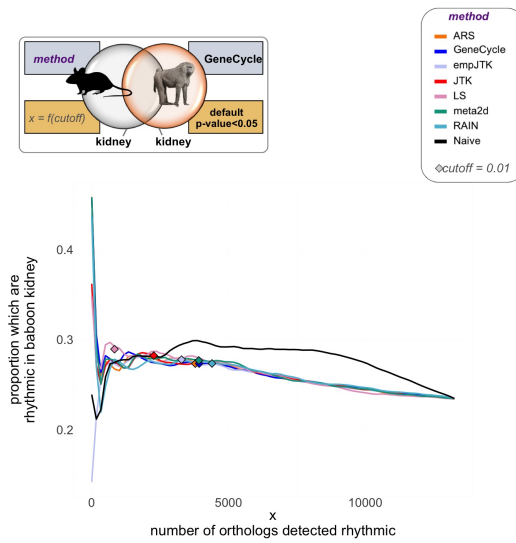

Fig. S12

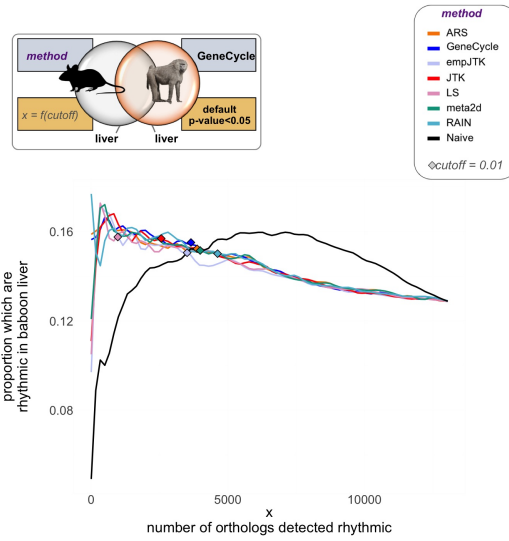

Fig. S13

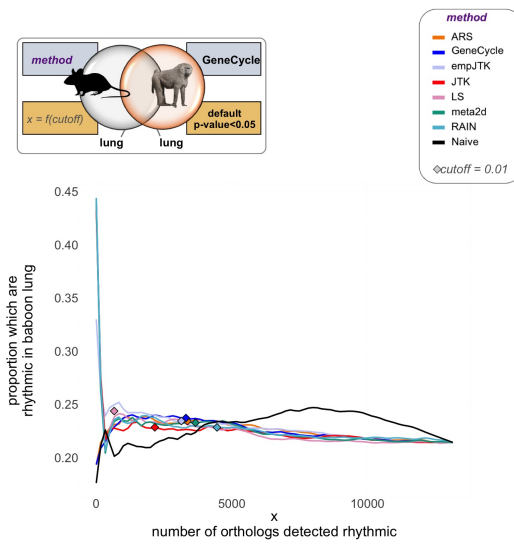

Fig. S14

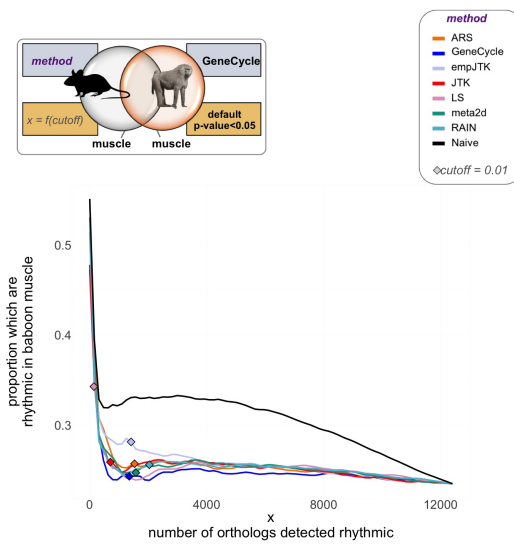

Fig. S15

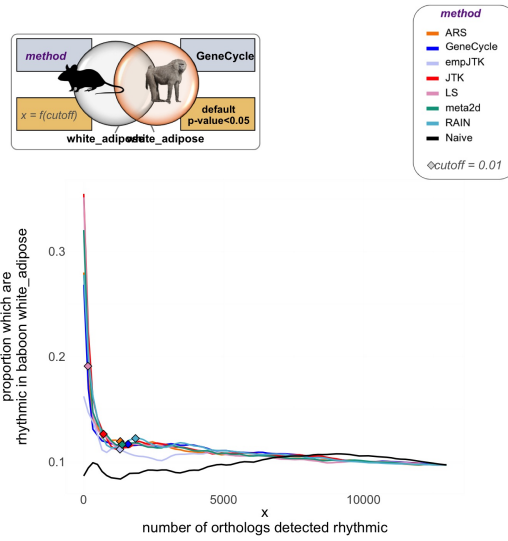

Fig. S16

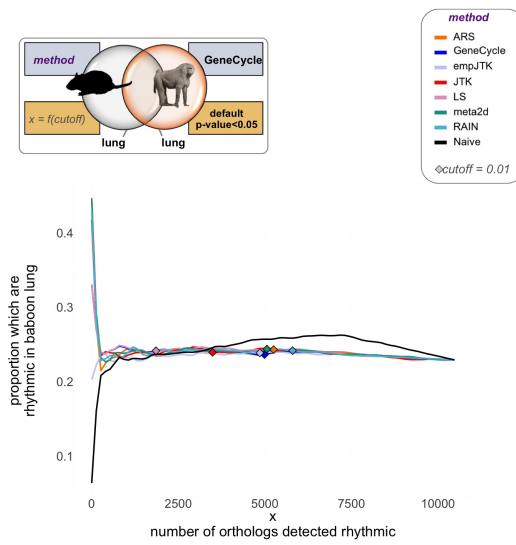

Fig. S17

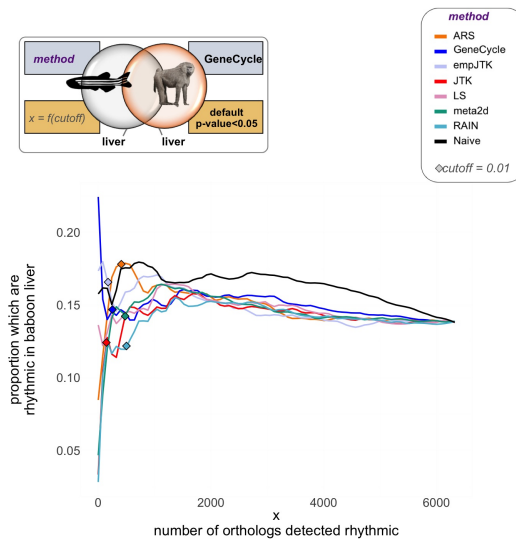

Fig. S18

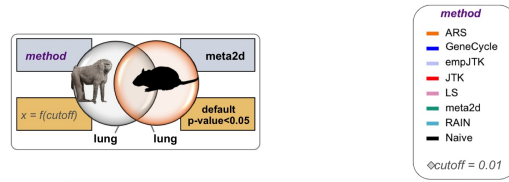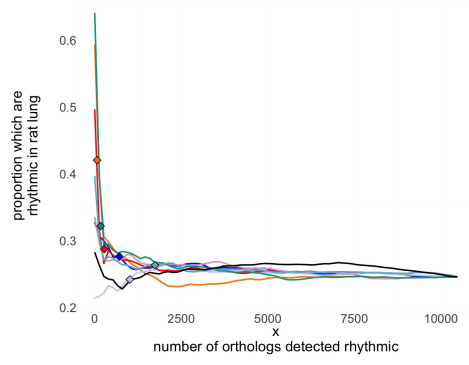

Fig. S19

**Images credit:** Anthony Caravaggi (mouse), Ian Quigley (zebrafish) both license CC BY-NC-SA 3.0, Wikipedia GNU GPL Muhammad Mahdi Karim (baboon), and Public Domain for other images (from <http://phylopic.org/>)
