# Supplementary material for: Methods detecting rhythmic gene expression are biologically relevant only for strong signal
Source: PubMed Central journal article supplement (PMC7100990; doi:10.1371/journal.pcbi.1007666), 2020-03-17
Supplement: pcbi.1007666.s007.pdf [file pcbi.1007666.s007.pdf]

# INSECTS

## Density distribution of raw and default $p$ -values

default  $p$ -values

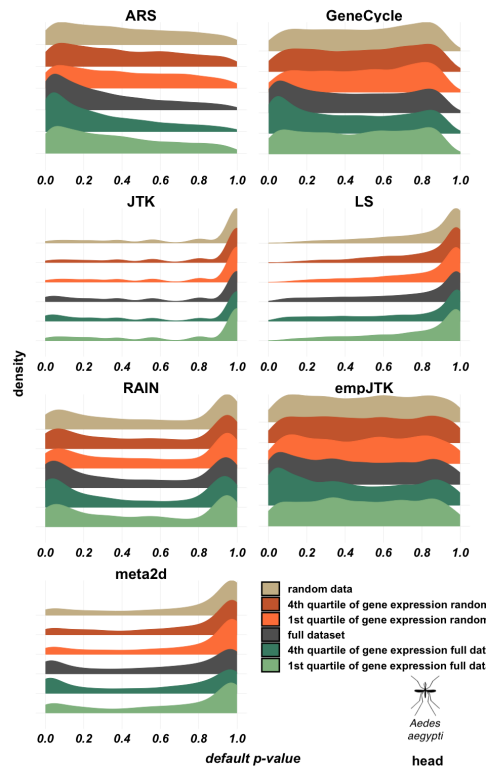

Fig. S1

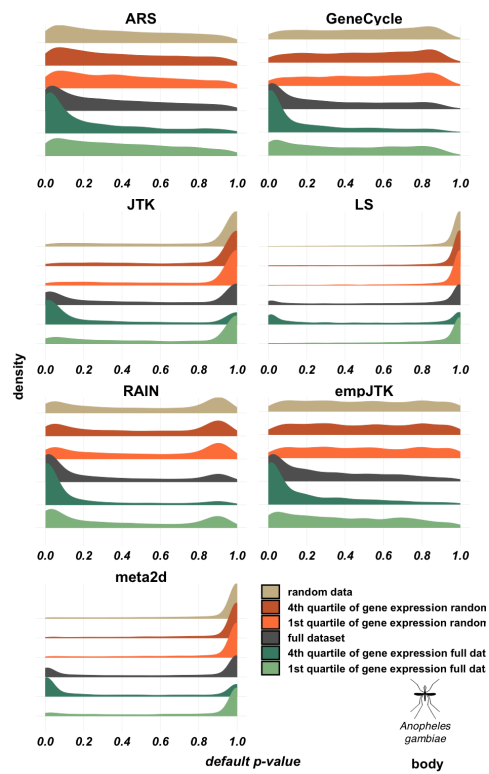

Fig. S2



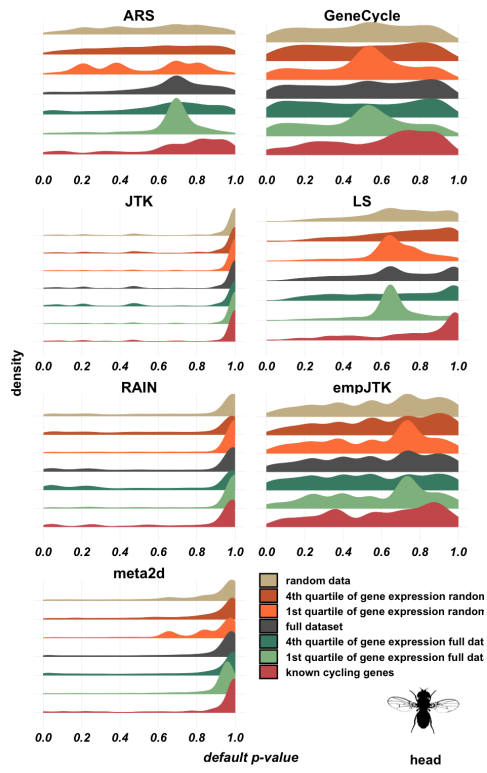

Fig. S5

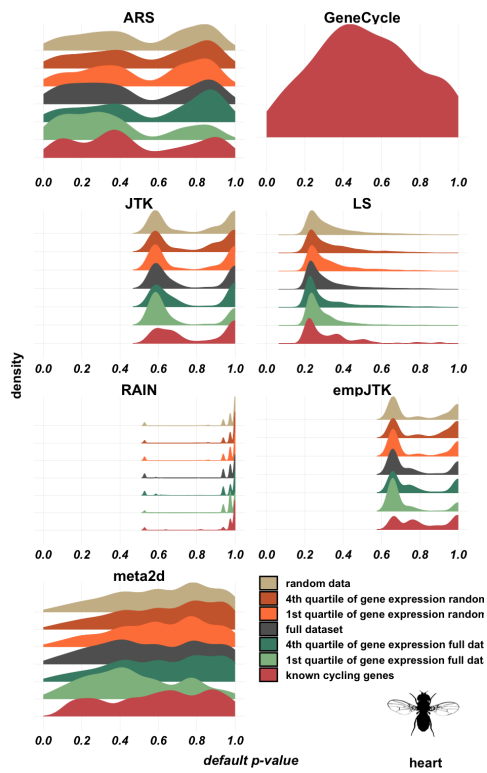

Fig. S6

raw *p*-values

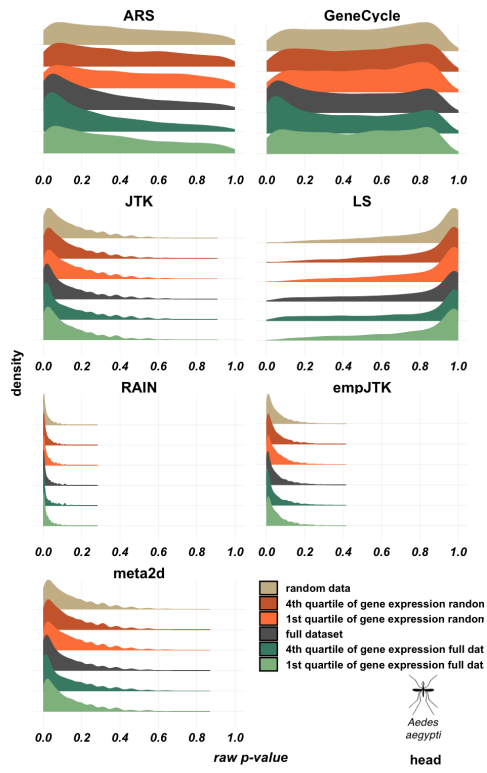

Fig. S7

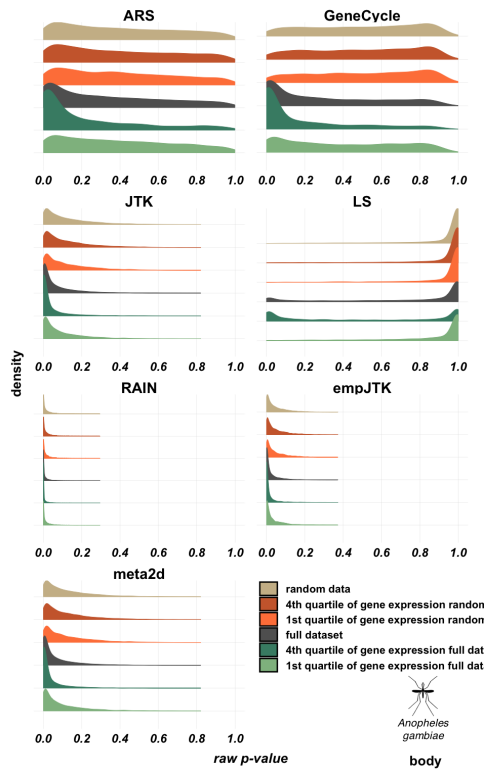

Fig. S8

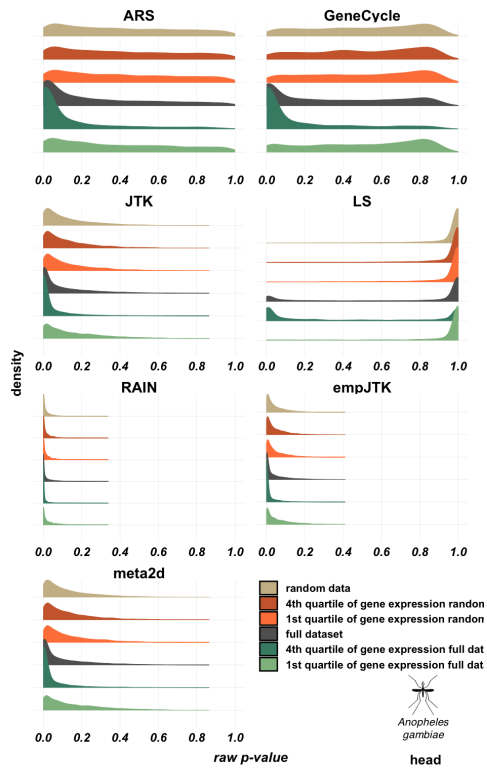

Fig. S9

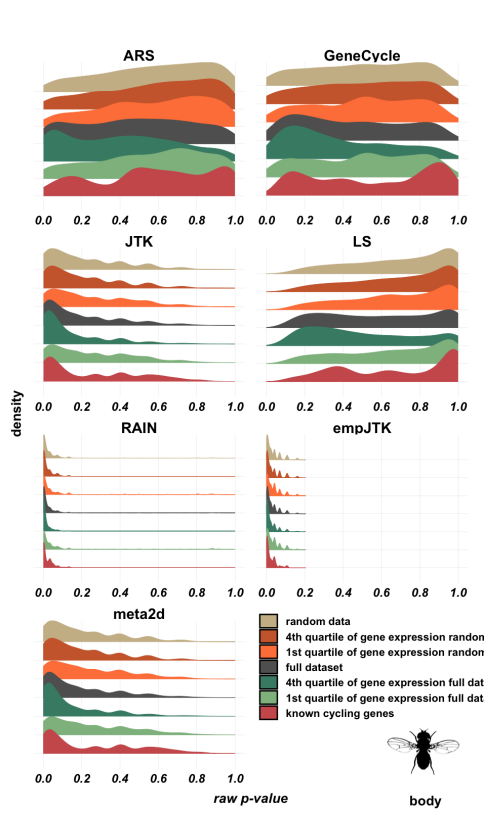

Fig. S10

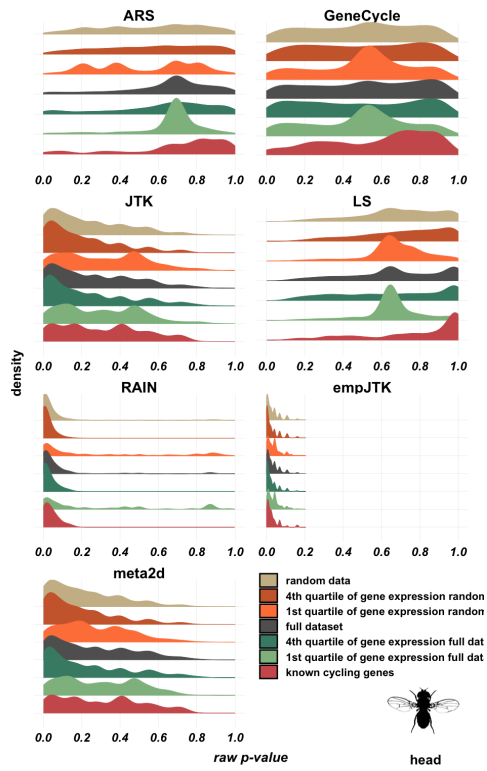

Fig. S11

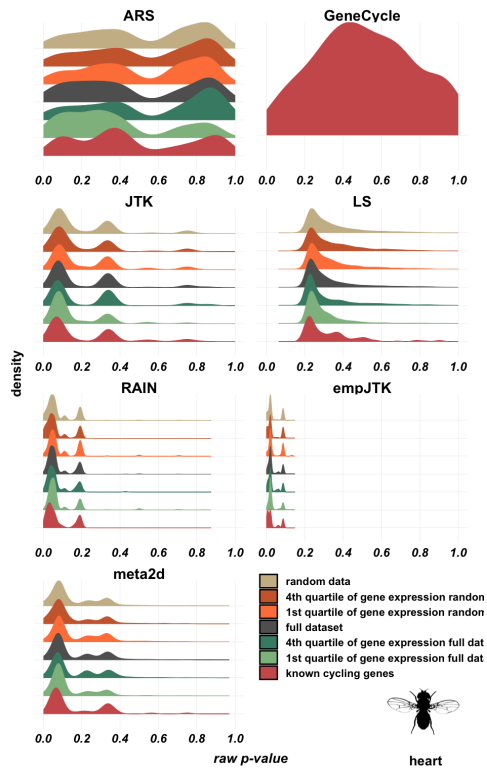

Fig. S12

Density distribution of  $p$ -values: rhythmic vs non-rhythmic orthologs

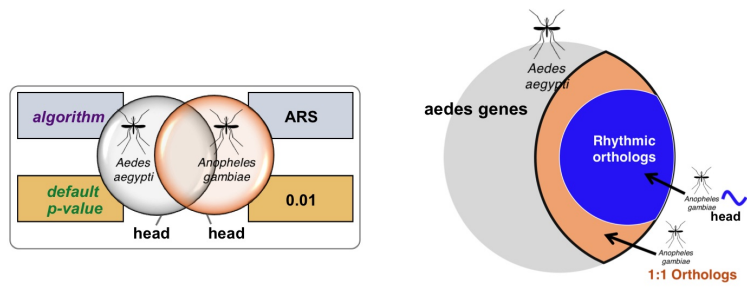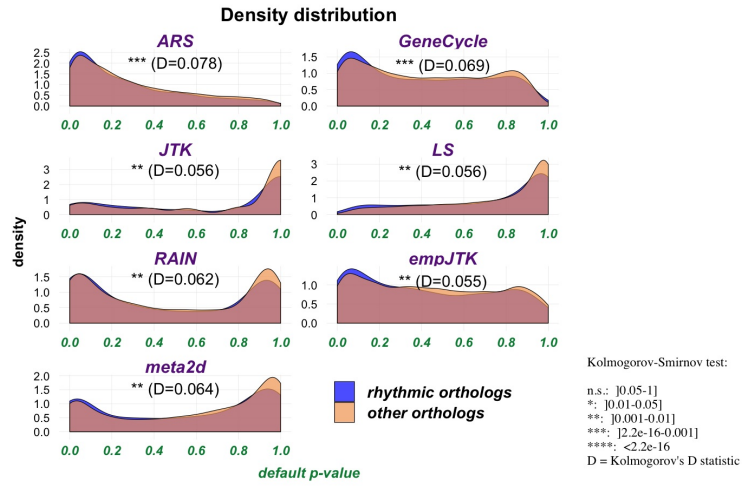

Fig. S13

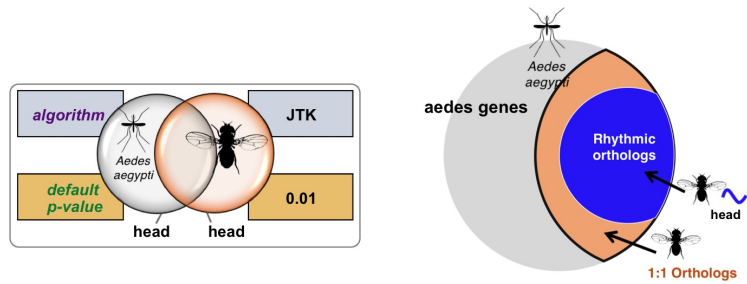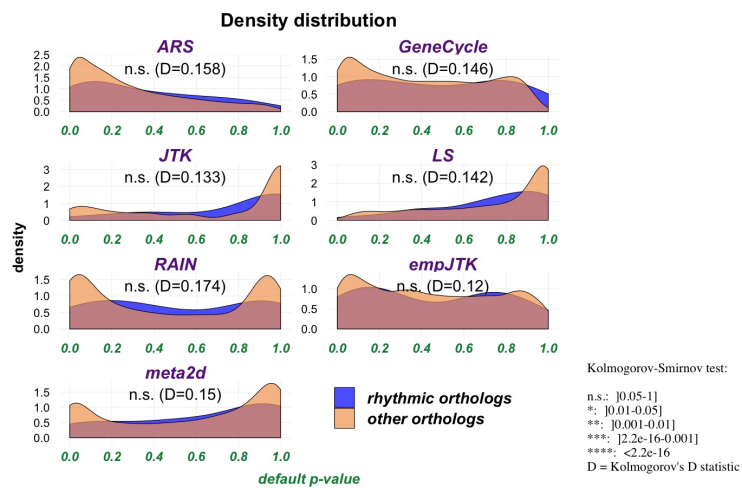

Fig. S14

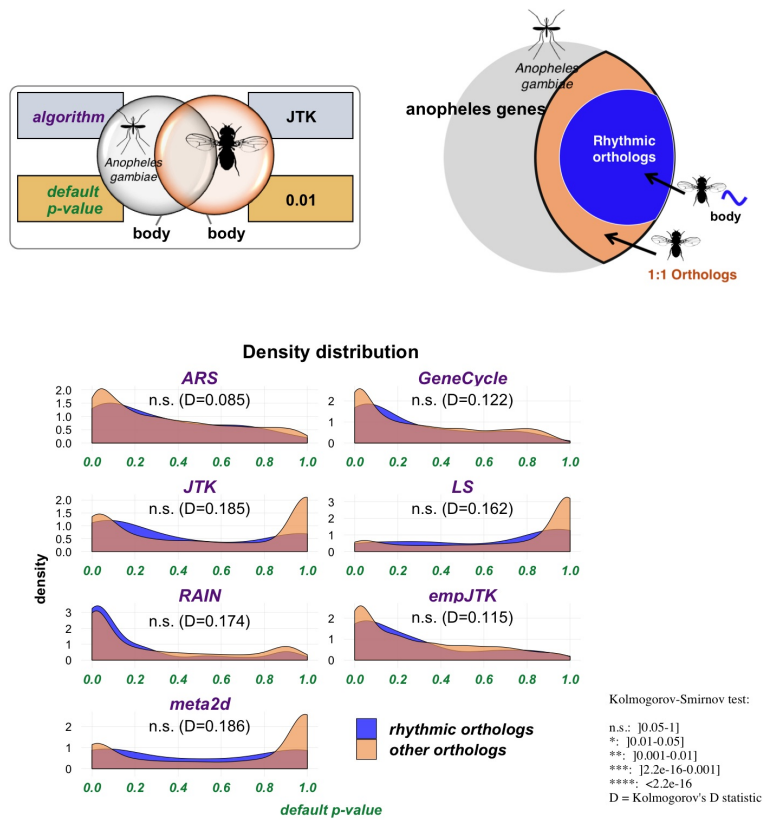

Fig. S15

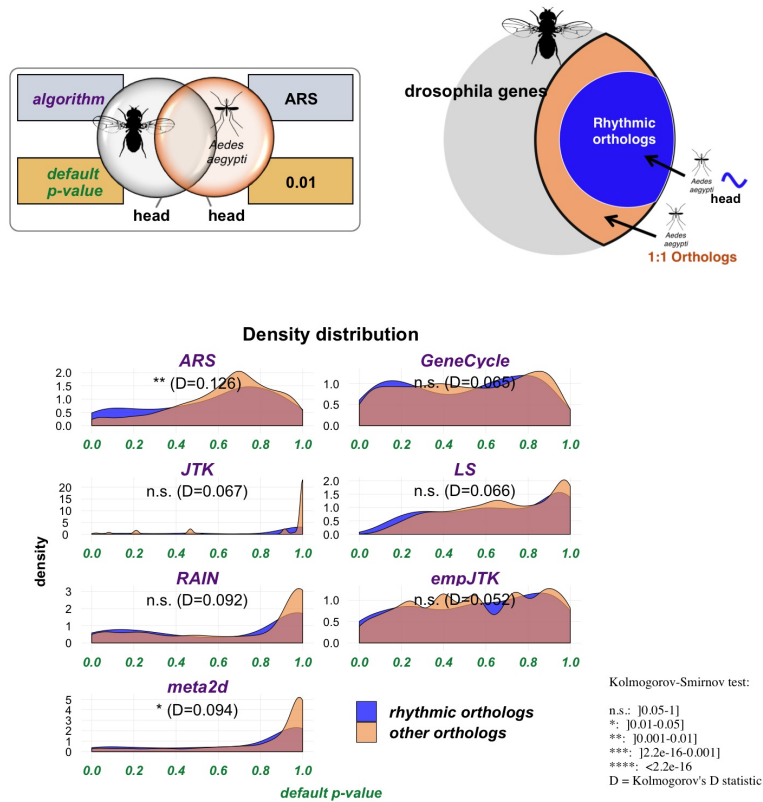

Fig. S16



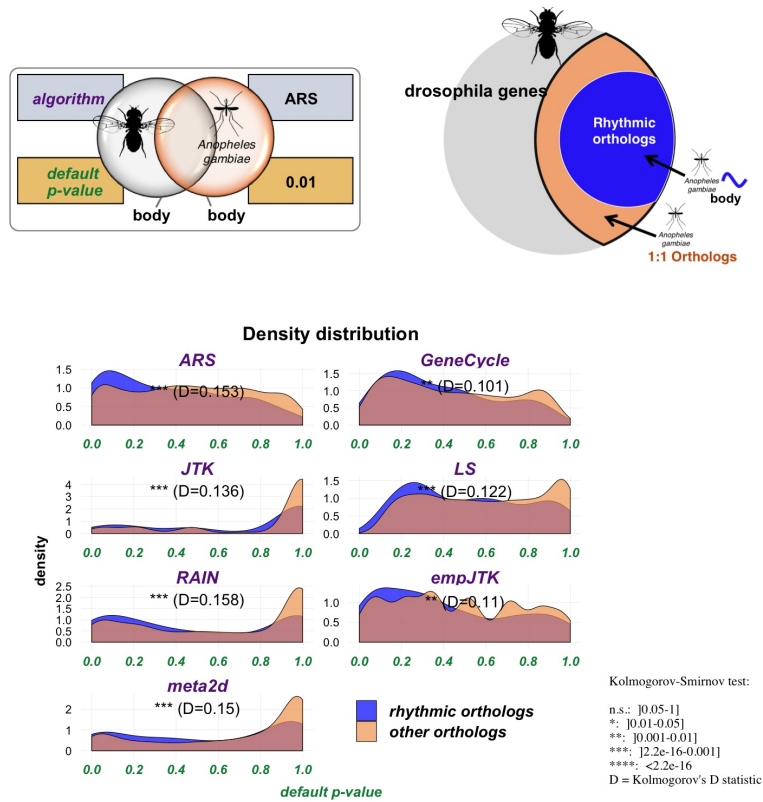

Fig. S17

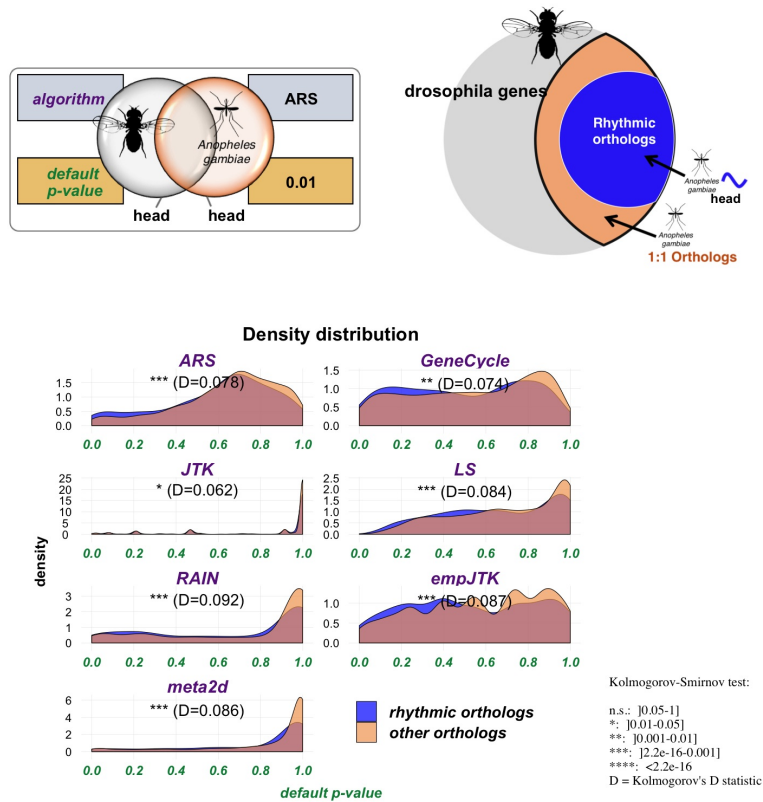

Fig. S18

Variation of the proportion A/B as a function of the number of orthologs detected rhythmic

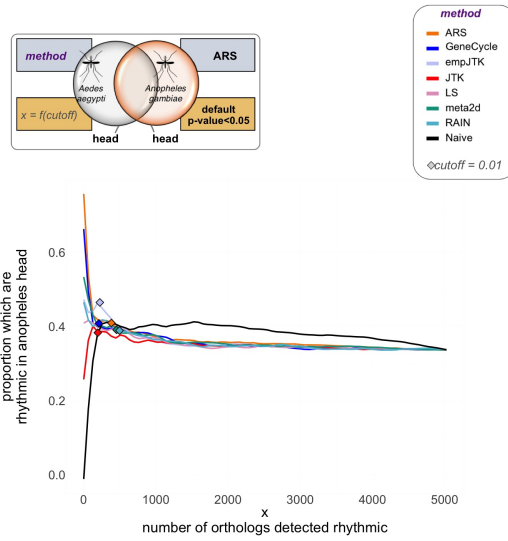

Fig. S19

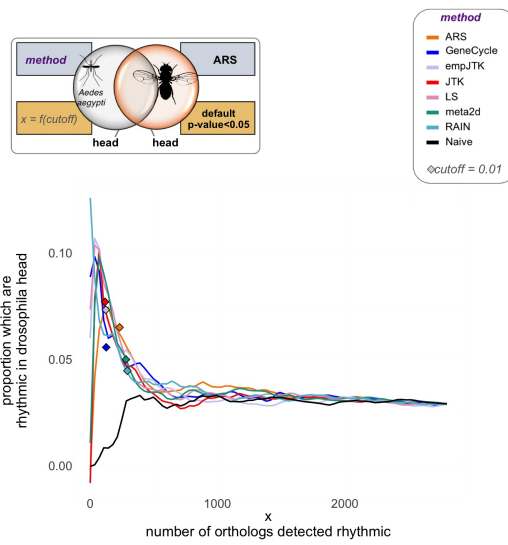

Fig. S20

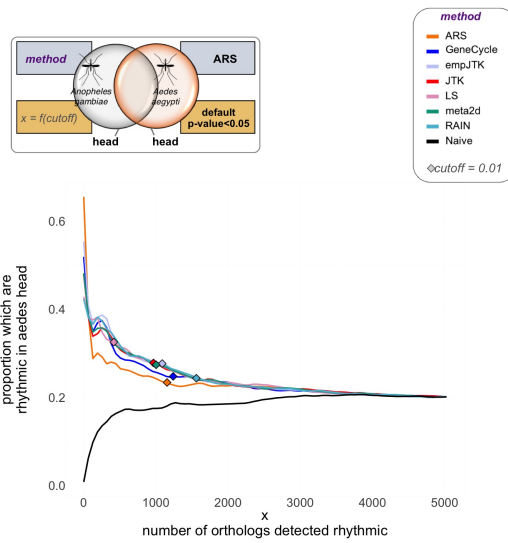

Fig. S21

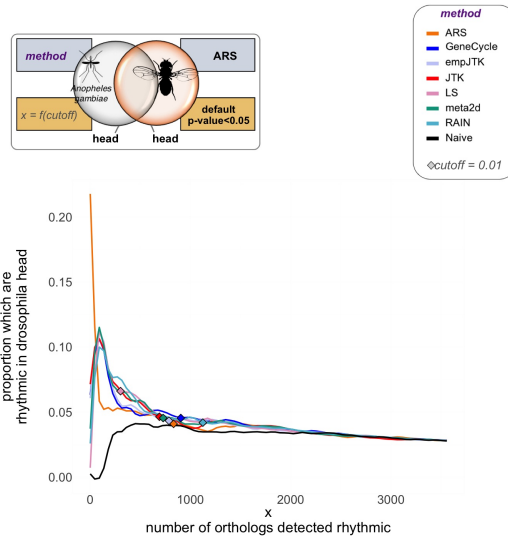

Fig. S22

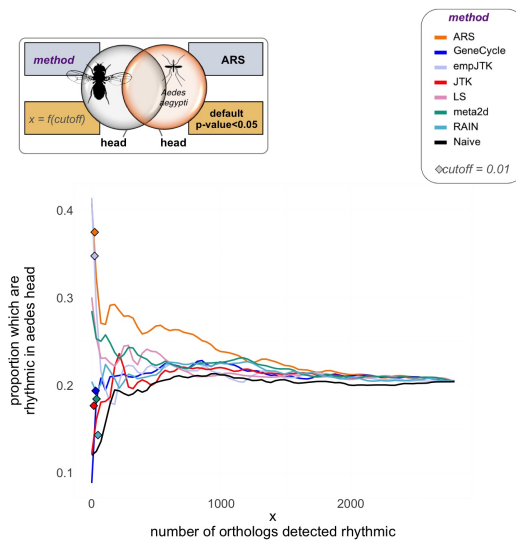

Fig. S23

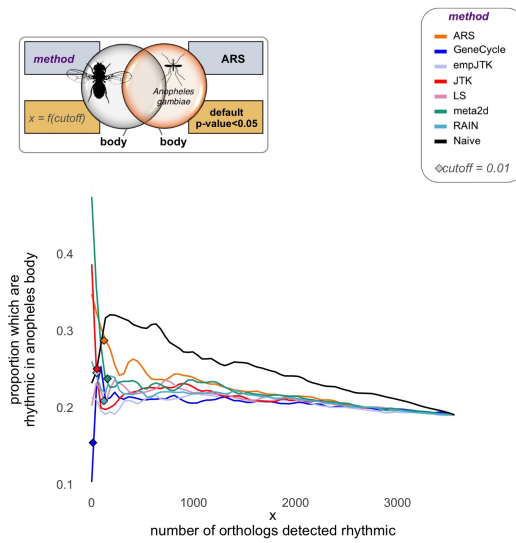

Fig. S24

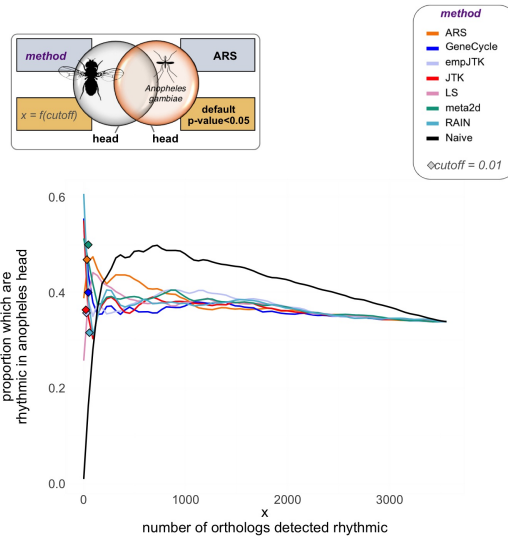

Fig. S25

**Images credit:** Anthony Caravaggi (mouse), Ian Quigley (zebrafish) both license CC BY-NC-SA 3.0, Wikipedia GNU GPL Muhammad Mahdi Karim (baboon), and Public Domain for other images (from <http://phylopic.org/>)
